# Supplementary material for: ACME dissociation: a versatile cell fixation-dissociation method for single-cell transcriptomics
Source: PubMed Central journal article supplement (PMC8028764; doi:10.1186/s13059-021-02302-5), 2021-04-08

## Supplementary Figure Legends:

### Figure S1: ACME-dissociated cell cytometry profiles in irradiated animals and comparison to trypsin.

**A:** Flow cytometry ungated and gated profiles of ACME-dissociated cells from non irradiated (left panels) and irradiated (right panels) *S. mediterranea* planarians, stained with DRAQ5 (nucleus) and Concanavalin-A (cytoplasm). The experiment was performed in 3 replicates. Axes are shown in subset logarithmic scale. **B:** Quantification of %G2 cells compared to all gated singlets. The values in the plot correspond to the average of the 3 replicates, and the error bars correspond to the standard deviation. **C:** Flow cytometry ungated and gated profiles of ACME-dissociated cells (top panels) and trypsin-dissociated cells (bottom panels) from *S. mediterranea* planarians stained with DRAQ5 (nucleus). The cytoplasm of ACME-dissociated and trypsin-dissociated cells was stained with Concanavalin-A and Calcein, respectively.

### Figure S2: Inference of RIN values.

**A:** Correlative analysis of RIN values and the % area of the two ribosomal bands compared to the total. The linear correlation is indicated in the chart. **B:** Tables containing the individual values extracted from the RNA samples displayed in Figures 3-4. The individual values not calculated by the RIN algorithm are shown in blue as inferred from the linear correlation.

### Figure S3: *Nematostella vectensis* metacell analysis.

**A:** Flow cytometry profiles of ACME-dissociated cells from *Nematostella vectensis*, showing all events (left) and G1/G0 singlets (right). **B:** Expression of 514 variable genes (rows) across 3,899 juvenile *N. vectensis* single cells sorted by metacell and cell type association. Top 30 genes (FC>2) per metacell are included, showing gene functional annotation when available. Transcription factors are highlighted in red. **C:** Total number of RNA molecules (left) and cells (right) per metacell.

### Figure S4: SPLiT-seq workflow and sub-library description

**A:** SPLiT-seq workflow: cells are randomly split in 96-well plates containing unique barcodes. The first RT round captures mRNAs using an anchored-poly dT barcode (BC 1). The second (BC 2) and third barcodes (BC 3, which includes the UMI) are ligated to the cDNA in two subsequent reactions. The last barcode (BC 4) is added in a final PCR reaction after tagmentation. **B:** Structure of the SPLiT-seq library. Paired-end reads (Read 1 and Read 2) and index were sequenced as indicated. **C:** Bioanalyzer profile of the 3 individual sub-libraries described here. **D:** Violin plots showing the distribution of UMI counts per cell in each sub-library for *S. mediterranea* (left) and *D. japonica* (right). **E:** UMAP visualization of *S. mediterranea* cells (top) and *D. japonica* cells (bottom), coloured by sub-library.

### Figure S5: Expression of previously published cell type markers in our dataset.

Feature plots of cell type markers from Plass *et al.* in our UMAP visualization of *S. mediterranea* cells.

### **Figure S6: Expression of germ line progenitor markers.**

**A:** Feature plots of germ line progenitor markers *Smed-eIF3c* and *Smed-nanos* in our *S. mediterranea* dataset and previously published studies: Plass *et al.* (downloaded from <https://shiny.mdc-berlin.de/psca/>), Fincher *et al.* (downloaded from <https://digiworm.wi.mit.edu/>) and Zeng *et al.* (downloaded from <https://planosphere.stowers.org>). **B:** Feature plots of germ line progenitor markers in the *D. japonica* dataset.

### **Figure S7: Analysis of high UMI-containing cell clusters**

A) UMAP visualization of 19,975 ACME-dissociated *S. mediterranea* cells (before >5000 UMI cut-off), and 14,263 ACME-dissociated *D. japonica* cells coloured by UMI content. B) Feature plots of germ line precursor progenitor marker *nanos* in the UMAP visualization of 19,975 *S. mediterranea* cells and 14,263 ACME-dissociated *D. japonica* cells. C) UMAP visualization of the 19,025 ACME-dissociated *S. mediterranea* cells (after >5000 UMI cut-off), and 13,406 ACME-dissociated *D. japonica* cells shown in Fig 7, coloured by UMI content.

### **Figure S8: Results of downsampling experiments, showing UMI, gene and cluster recovery at a variety of equivalent cutoff points.**

Downsampling statistics shown are: Statistics after downsampling García-Castro raw reads to 1,200,007,715 (Plass *et al.* total). Statistics after downsampling all Plass *et al.* reads to 560,518,316 (García-Castro, usable total). Statistics after downsampling both Plass *et al.* and García-Castro results to 10k mapped reads per cell. Also shown are the resulting UMAP representations from these downsampled sets, in the same order as the raw statistics. Note that we observe 40 rather than 41 clusters in our sample when downsampled to approx 88% of original raw read count to match the raw Plass *et al.* number. We see 24 rather than 38 clusters in the Plass *et al.* sample when we downsample these reads to match the number of reads from García-Castro used in analysis (46.7% of the original Plass count). When 10k mapped reads are used per cell, there is no loss of cluster representation in the García-Castro dataset compared to the overall analysis, but 33 (c.f. 38) clusters are seen in the Plass *et al.* data.

### **Figure S9: Comparison of results of differential expression analysis, Plass *et al.* vs García-Castro *et al.***

Comparisons made between neoblast clusters and mature cell types for each dataset as noted. Excellent overlap was seen in recovered genes (74.3 - 84.4% of the DE genes found in ACME-dissociated García-Castro DE analysis were also found in the Trypsin-dissociated Plass *et al.* comparisons). These also show a clear correlation in log fold change values when García-Castro and Plass *et al.* results are compared, in all cell types examined.

**Figure S10: Comparison of distribution of UMI counts and genes detected per cluster in this study and Plass *et al.***

**A:** Violin plots showing the distribution of UMI counts per cluster in ACME-dissociated (left) and trypsin-dissociated (right) *S. mediterranea* cells reanalysed from Plass *et al.* **B:** Violin plots showing the distribution of genes detected per cluster in ACME-dissociated (left) and trypsin-dissociated (right) *S. mediterranea* cells reanalysed from Plass *et al.* Colours of plots match those of the clusters shown in Figs 7A and 8B (ACME and Plass cells respectively) and are ordered according to cluster identity.

**Figure S11: Integrative analysis of trypsin- and ACME-dissociated datasets**

**A:** Analysis workflow. **B:** UMAP visualization of 21,610 trypsin-dissociated *S. mediterranea* cells reanalysed from Plass *et al.*, coloured by cluster identity and annotated on the basis of marker genes. **C:** UMAP visualisation of 21,610 trypsin-dissociated *S. mediterranea* cells. Cells annotated as germ cells are coloured by transfer labels analysis from ACME-dissociated cells. **D:** Feature plots of germ line progenitor markers *Smed-eIF3c* and *Smed-nanos* in the UMAP visualization of 21,610 trypsin-dissociated *S. mediterranea* cells reanalysed from Plass *et al.* **E:** UMAP visualization of 40,635 cells integrating trypsin-dissociated and ACME-dissociated clusters coloured by transfer labels analysis from trypsin-dissociated cells.

A

## ACME dissociation

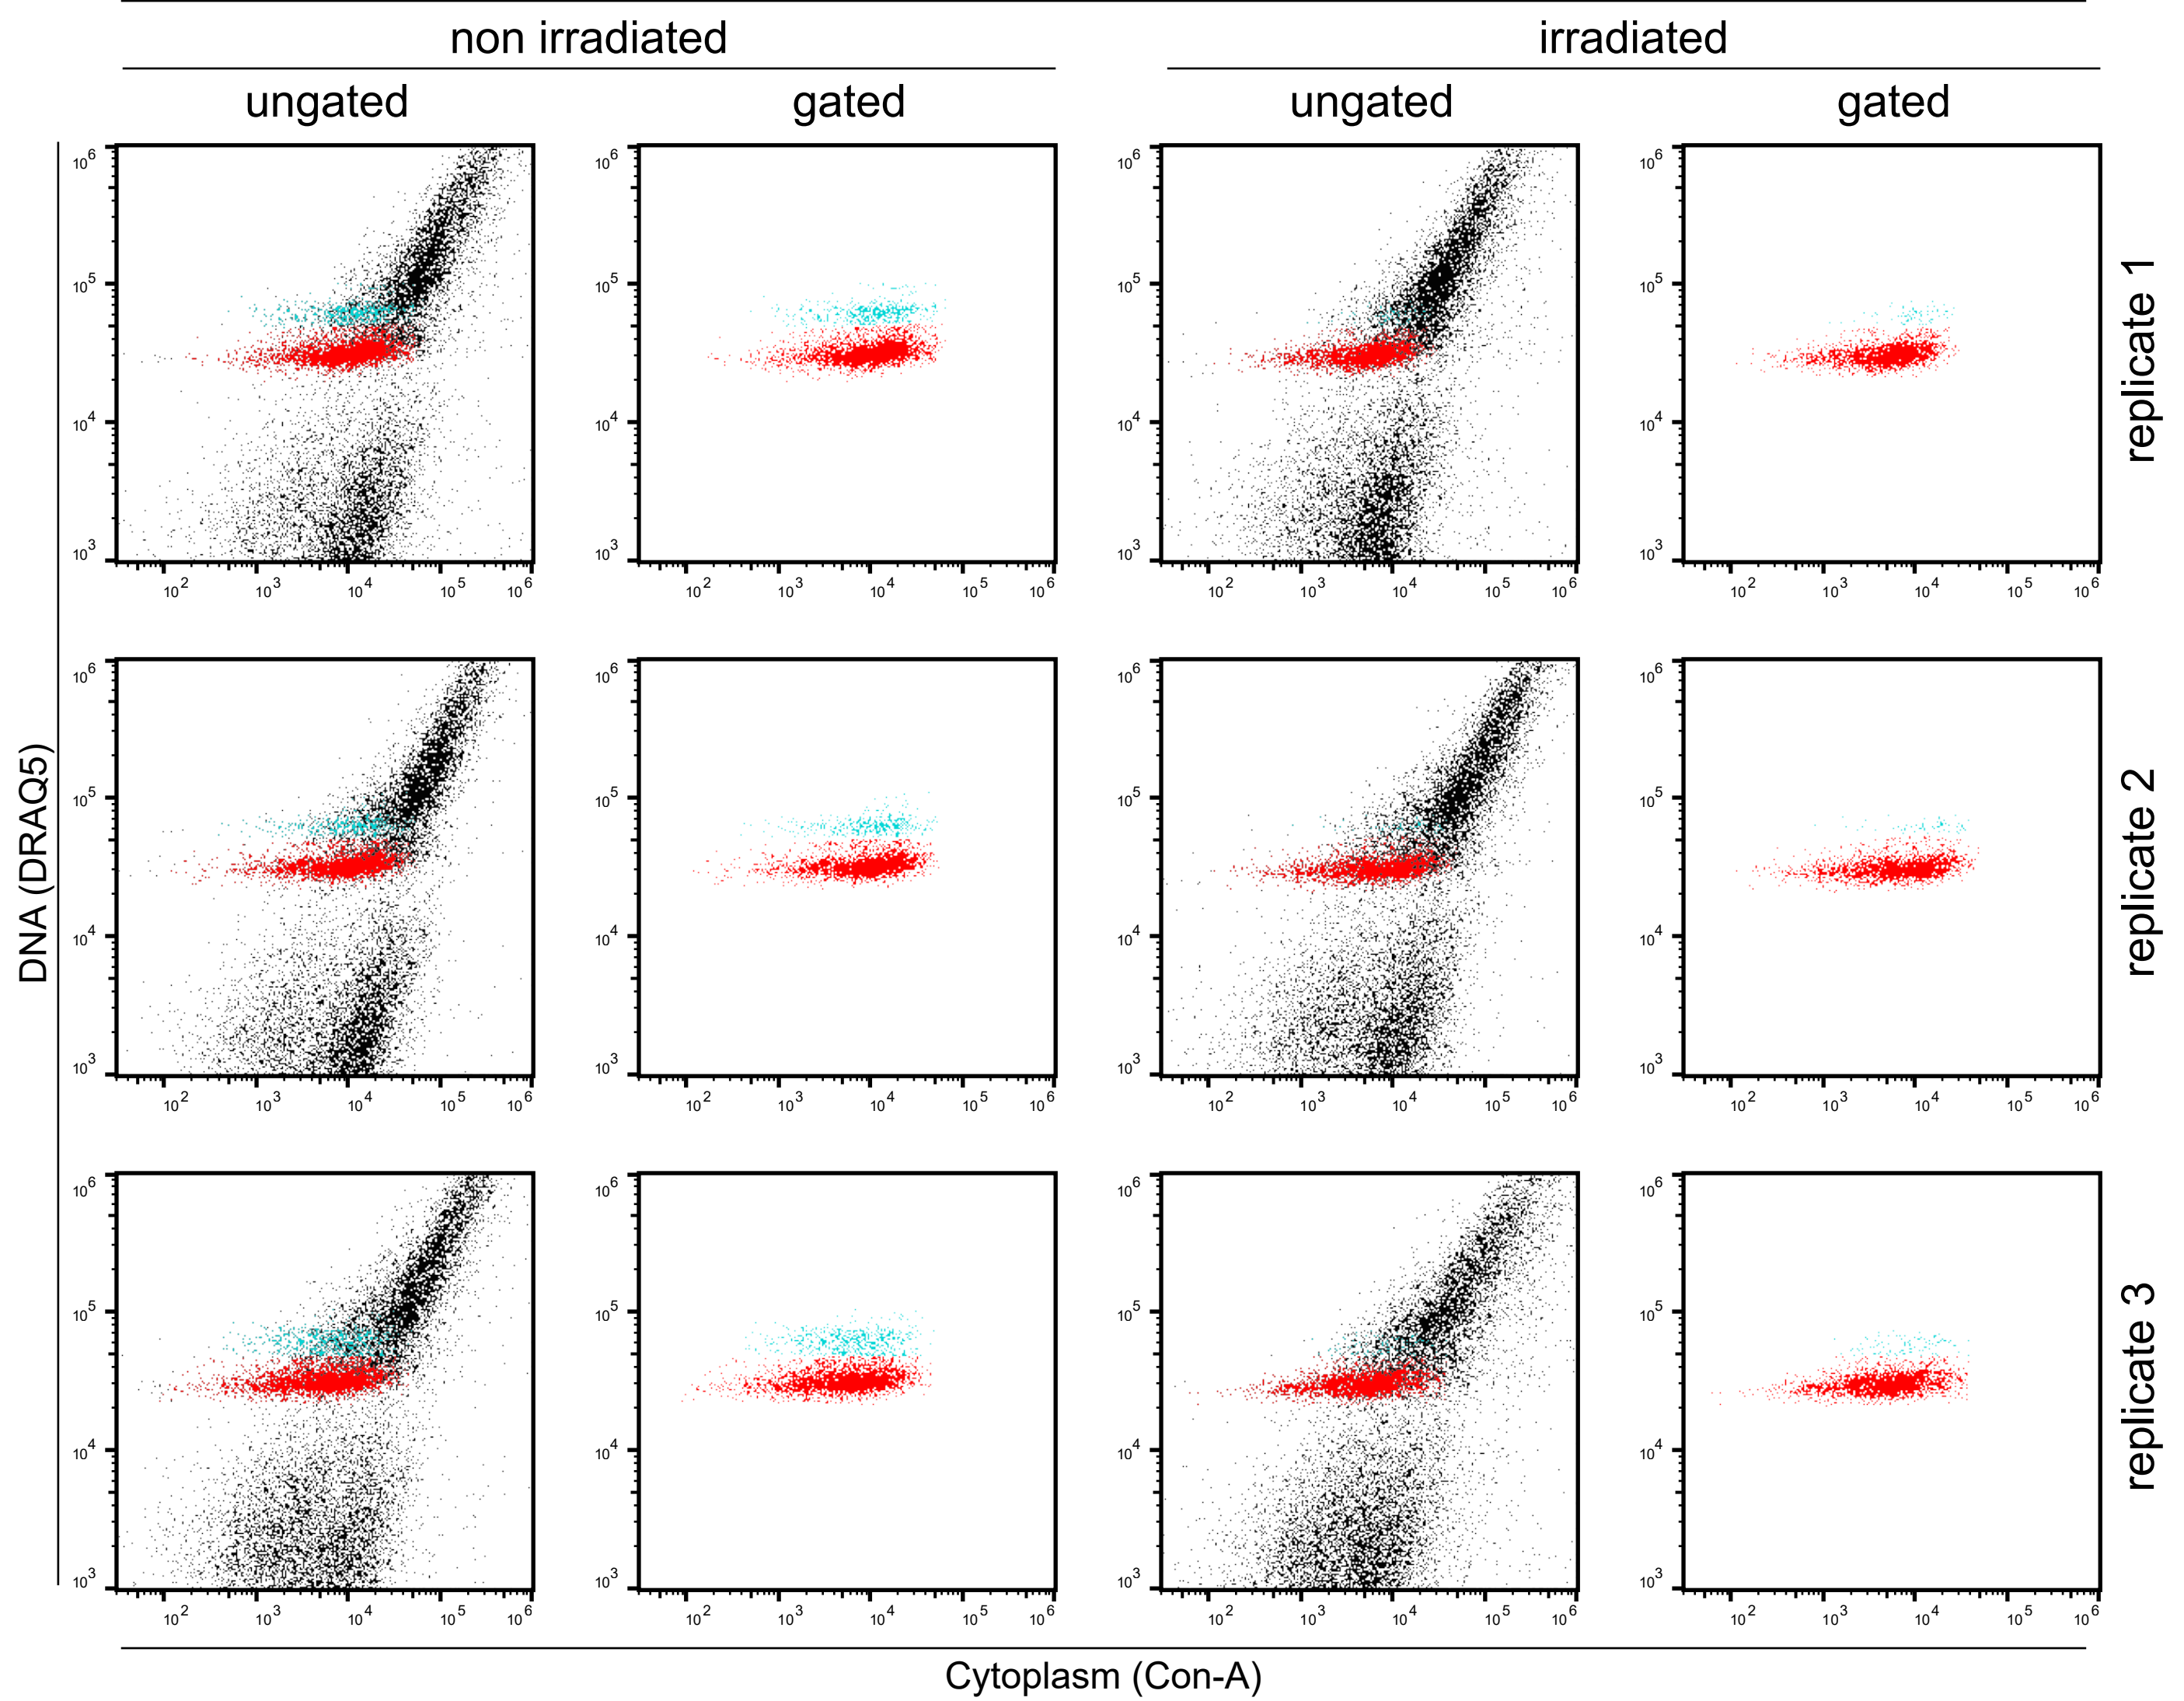

B

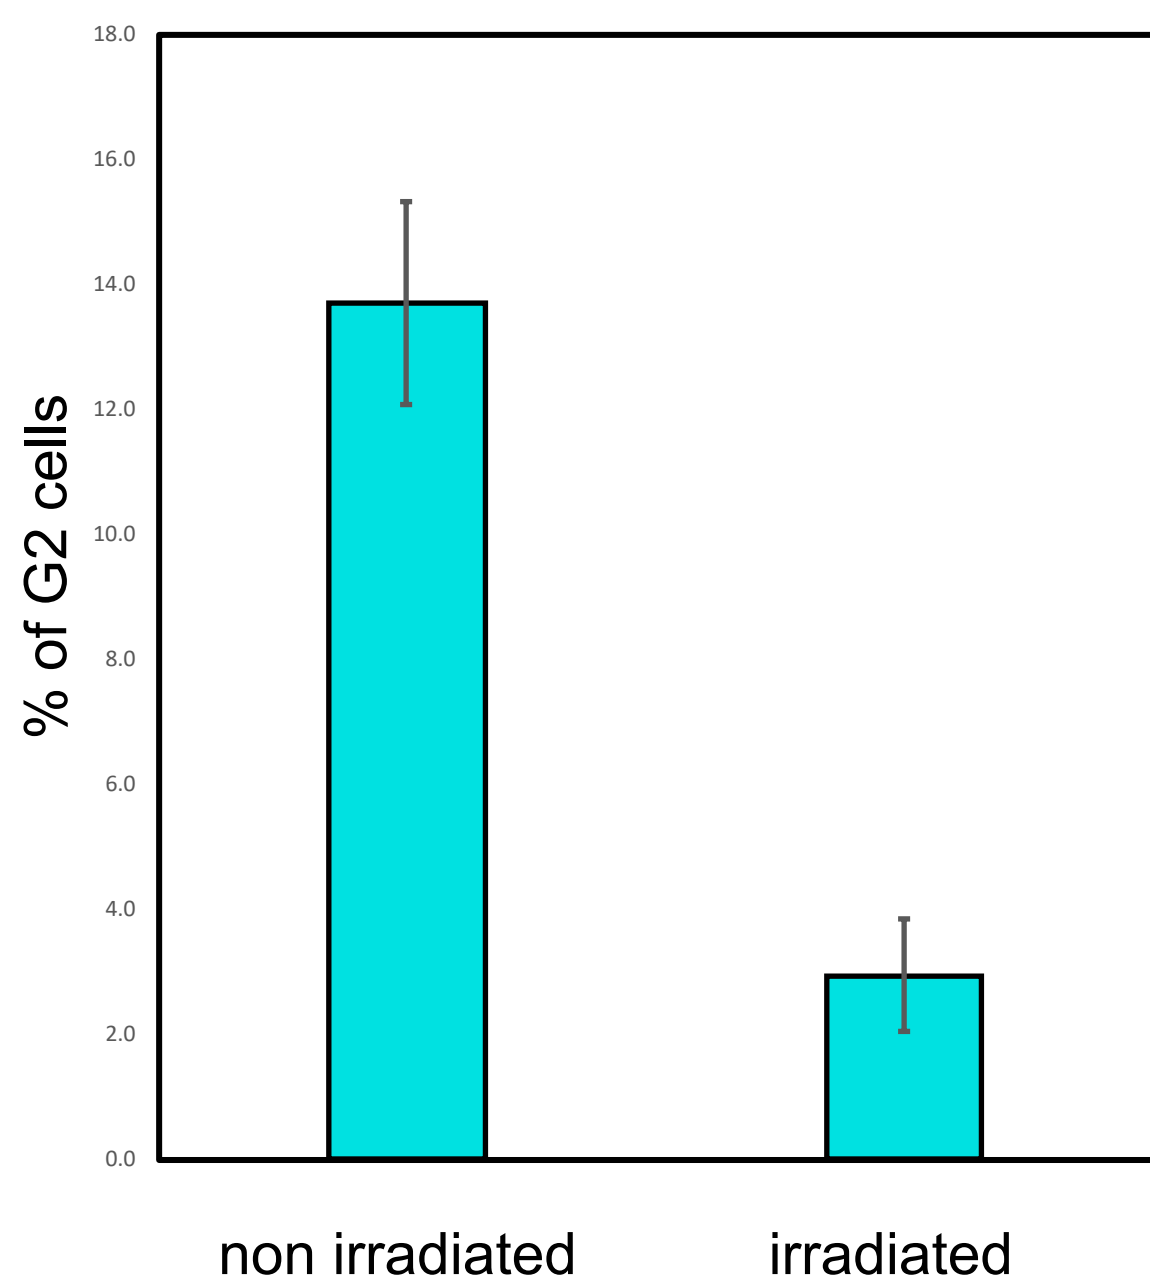

C

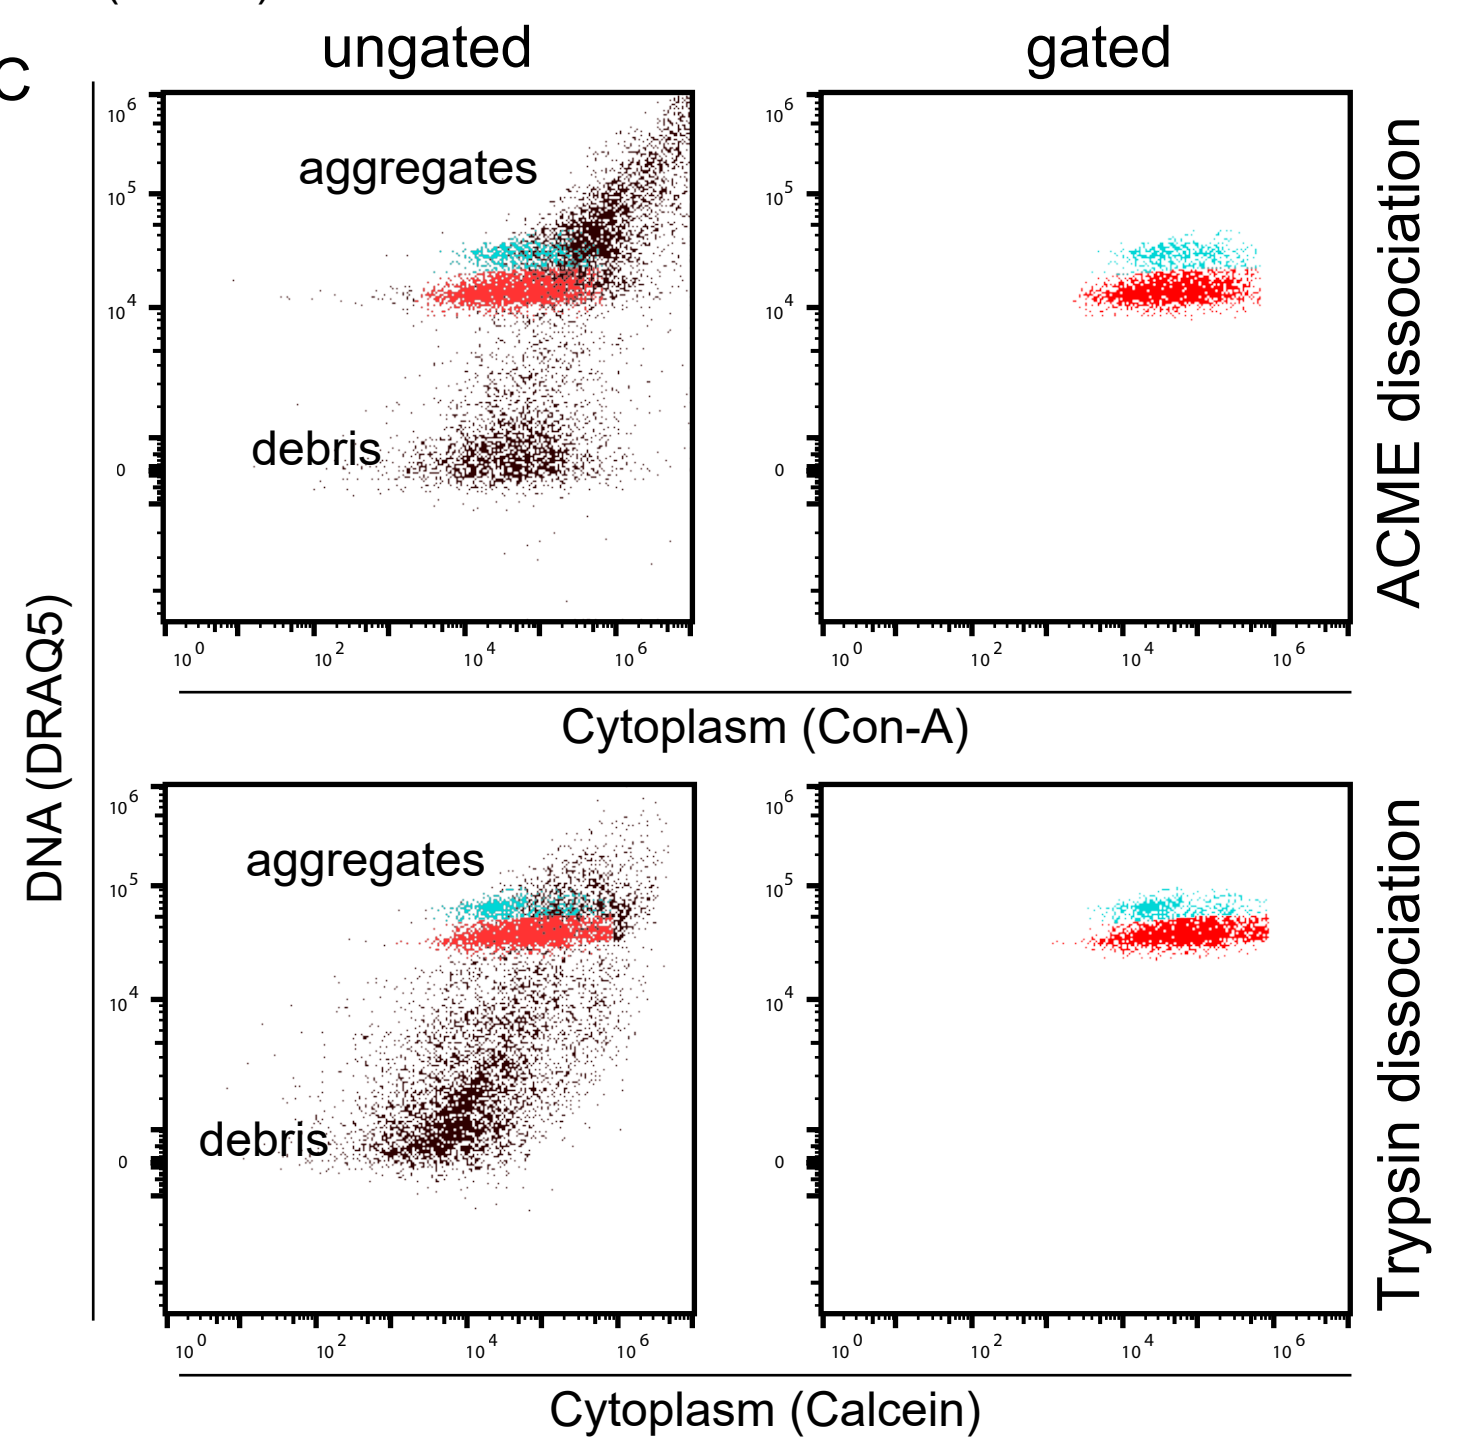



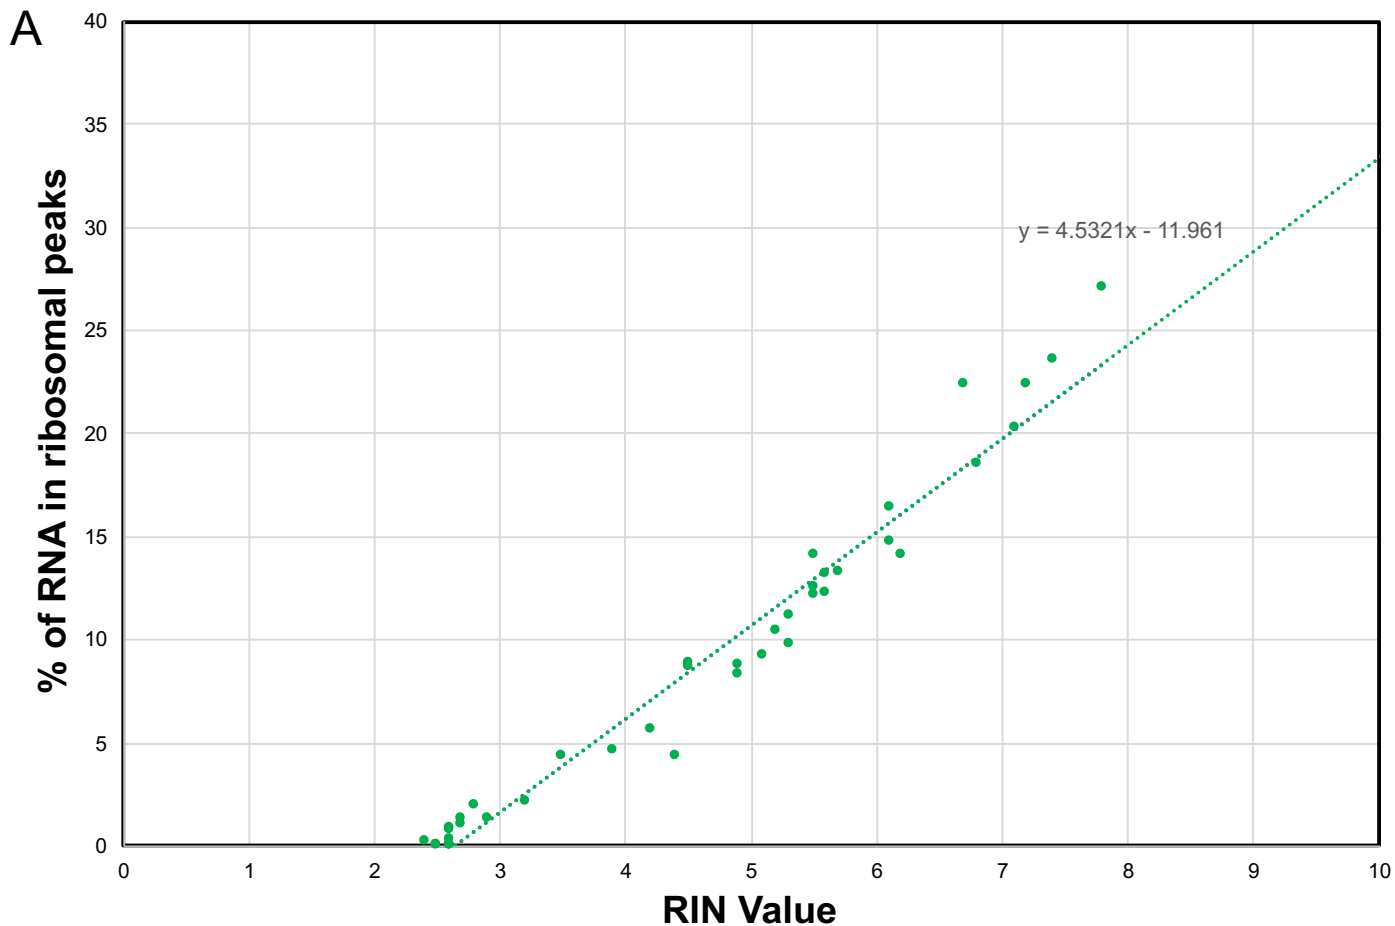

**B**

| Figure 3H | RIN | RNA conc (ng/uL) | % in peaks |
|-----------|-----|------------------|------------|
| t= 0      | 7.8 | 143              | 27         |
| 1 hour    | 3.5 | 148              | 4.3        |
| 2 hours   | 3.2 | 114              | 2.1        |
| 3 hours   | 2.8 | 170              | 1.9        |
| 4 hours   | 2.9 | 187              | 1.3        |
| 5 hours   | 2.7 | 222              | 1.3        |
| 6 hours   | 2.6 | 218              | 0.8        |

| Figure 3G | RIN | RNA conc (ng/uL) | % in peaks | Inferred RIN |
|-----------|-----|------------------|------------|--------------|
| Control   | N/C | 105              | 46.4       | 10           |

| Figure 3J | RIN | RNA conc (ng/uL) | % in peaks | Inferred RIN |
|-----------|-----|------------------|------------|--------------|
| B         | N/C | 161              | 28.7       | 9.0          |
| C         | 7.4 | 243              | 23.5       | -            |
| D         | 4.2 | 211              | 5.6        | -            |
| E         | 5.5 | 292              | 14.1       | -            |

| Figure 3I | RIN | RNA conc (ng/uL) | % in peaks |
|-----------|-----|------------------|------------|
| t= 0      | 7.2 | 147              | 22.3       |
| 1 hour    | 6.1 | 192              | 14.7       |
| 2 hours   | 4.5 | 192              | 8.8        |
| 3 hours   | 4.9 | 141              | 8.7        |
| 4 hours   | 5.1 | 206              | 9.2        |
| 5 hours   | 4.9 | 233              | 8.3        |
| 6 hours   | 4.5 | 275              | 8.6        |

| Figure 4C    | RIN | RNA conc (ng/uL) | % in peaks | Inferred RIN |
|--------------|-----|------------------|------------|--------------|
| Trypsin      | 6.2 | 216              | 14.1       | -            |
| Try + Mace   | 3.9 | 272              | 4.6        | -            |
| Try + 0.5 FA | N/C | 192              | 5.5        | 3.9          |
| Try + 1 FA   | 2.5 | 145              | 0          | -            |
| Try + 2 FA   | 2.5 | 212              | 0          | -            |
| Try + 3 FA   | 2.6 | 210              | 0          | -            |
| Try + 4 FA   | 2.6 | 143              | 0          | -            |

| Figure 3K | RIN | RNA conc (ng/uL) | % in peaks |
|-----------|-----|------------------|------------|
| 1 cycle   | 6.7 | 151              | 22.3       |
| 2 cycles  | 6.1 | 205              | 16.4       |
| 3 cycles  | 5.7 | 192              | 13.2       |
| 4 cycles  | 5.5 | 150              | 12.5       |
| 5 cycles  | 5.3 | 162              | 9.7        |

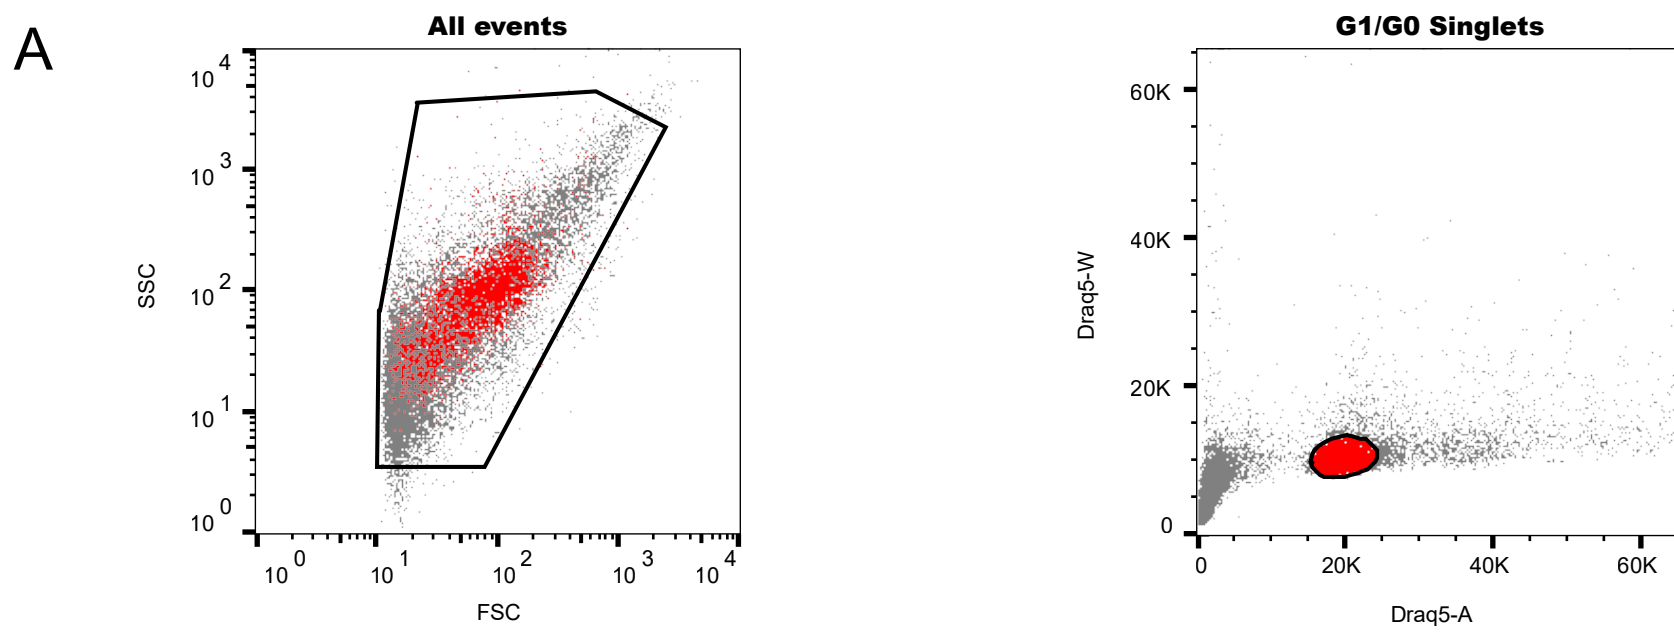

**B**

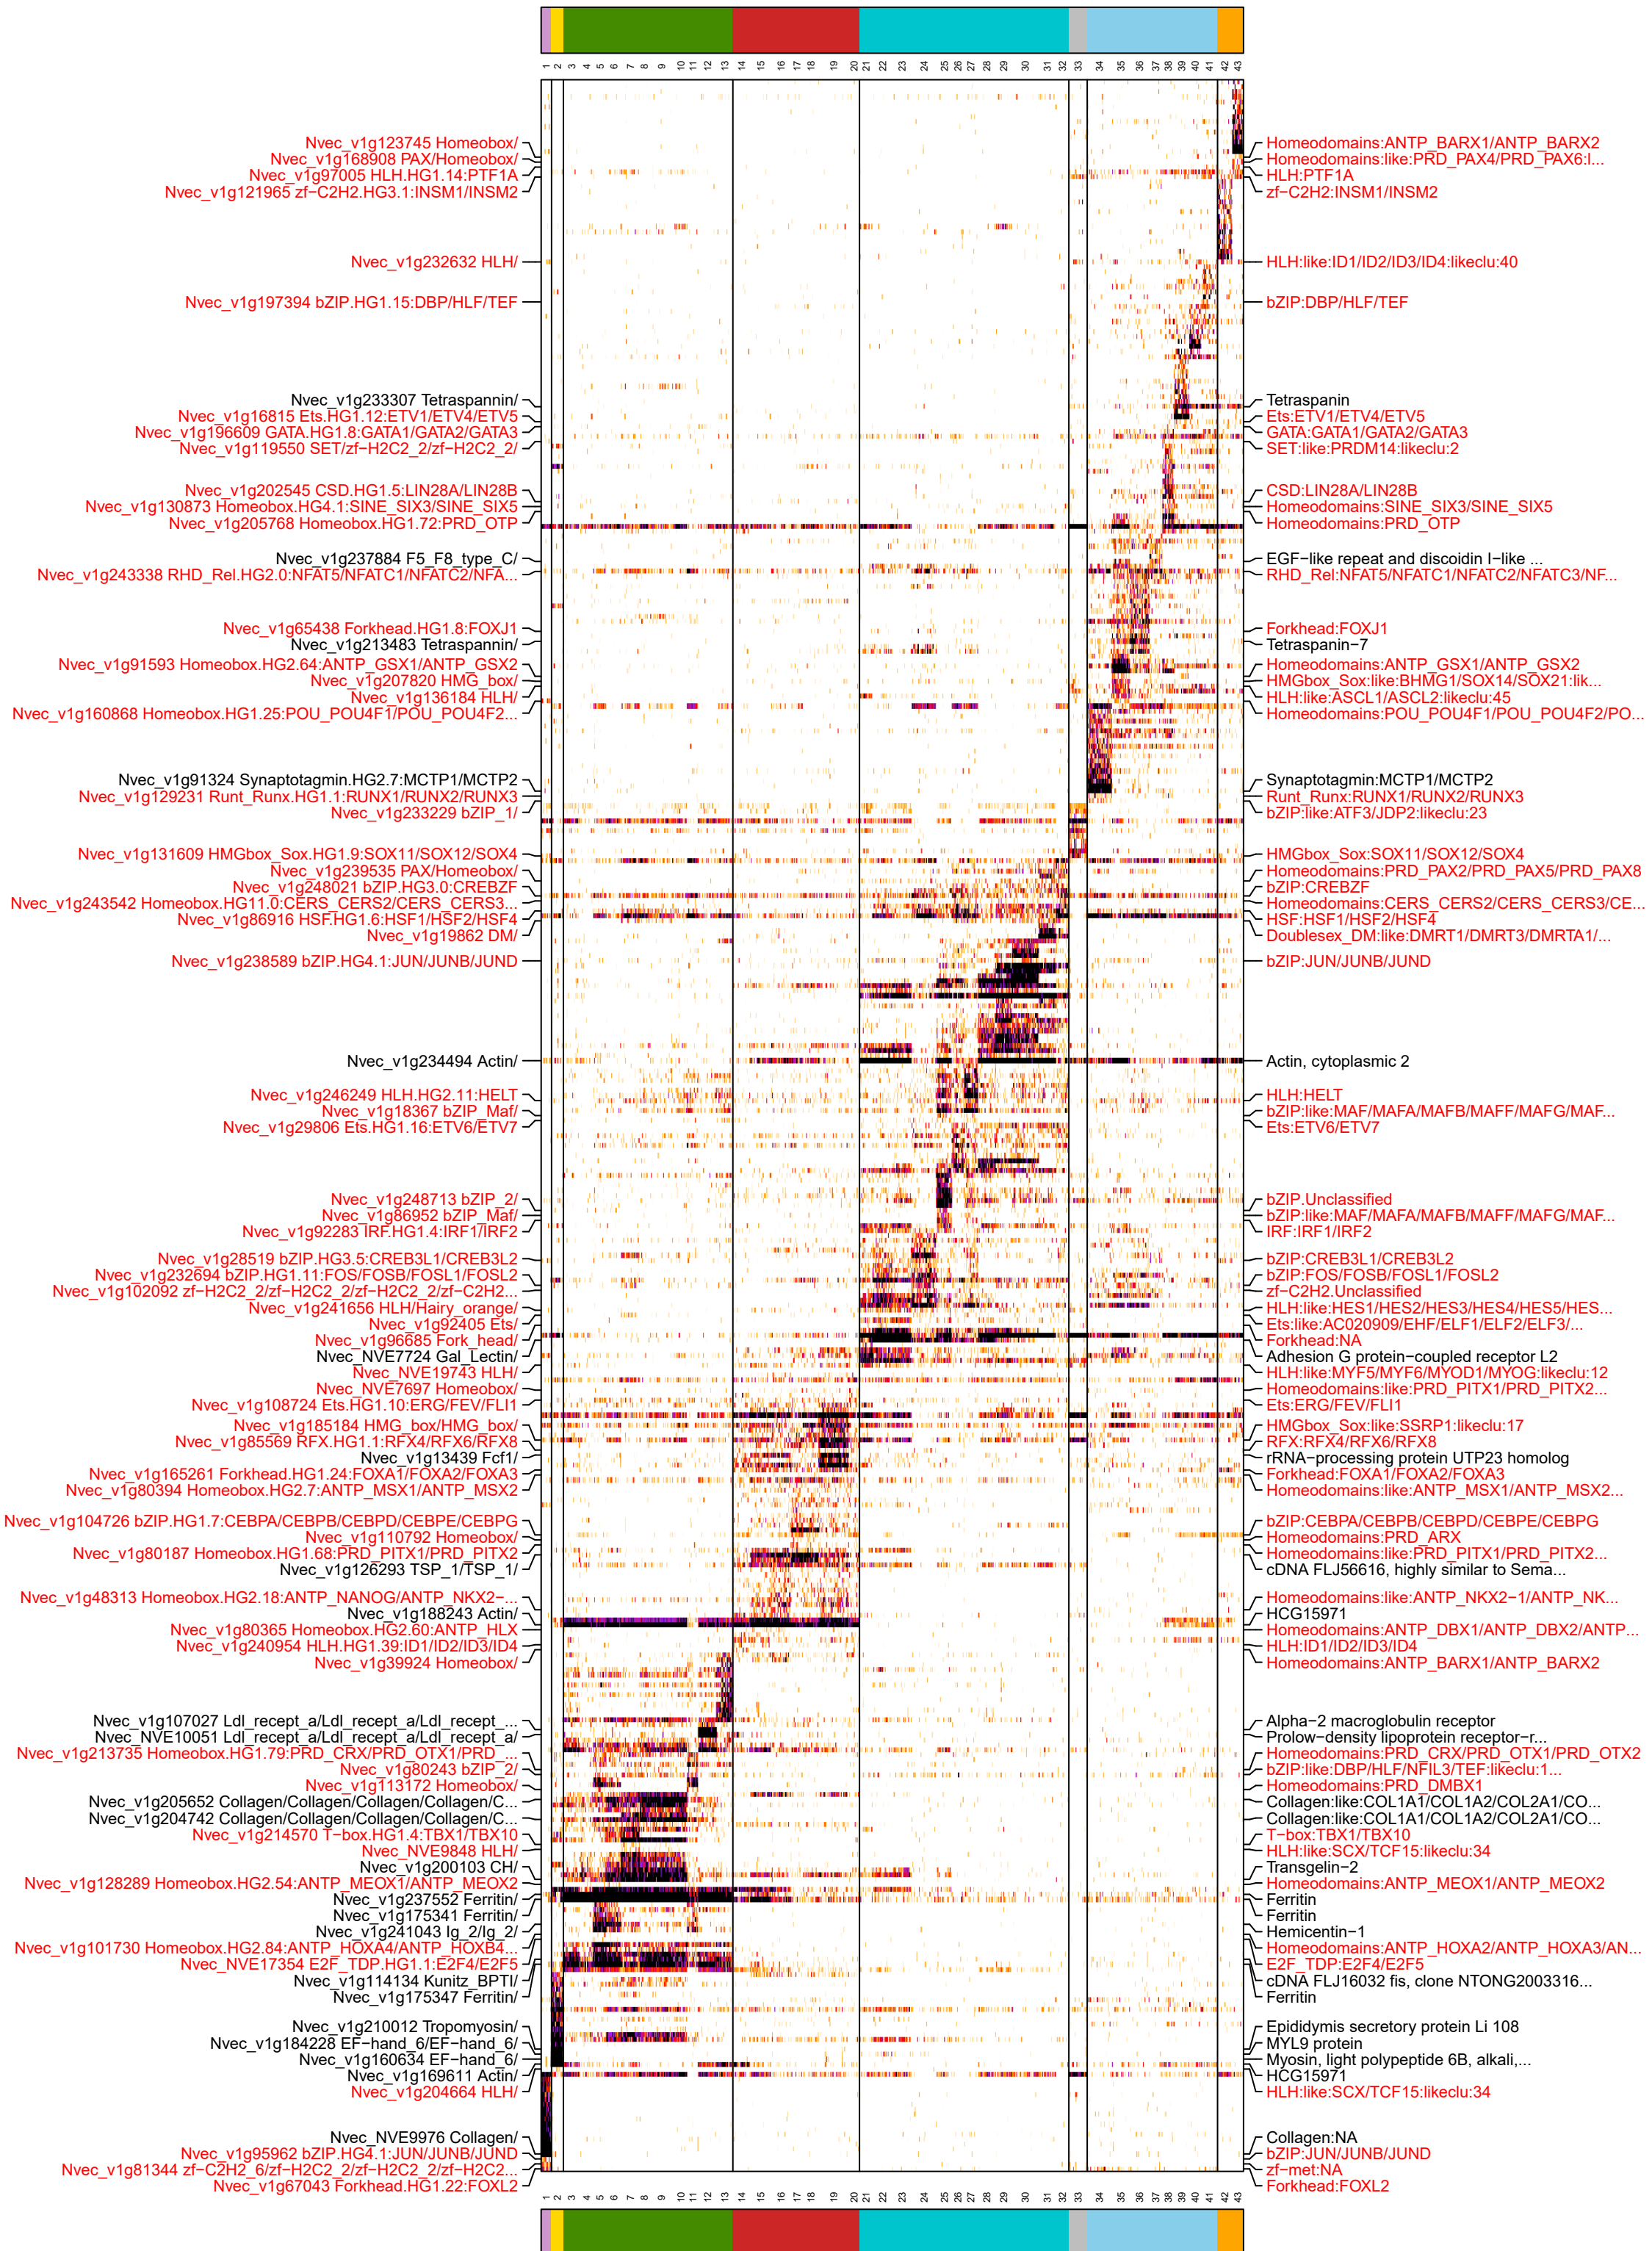

**C**

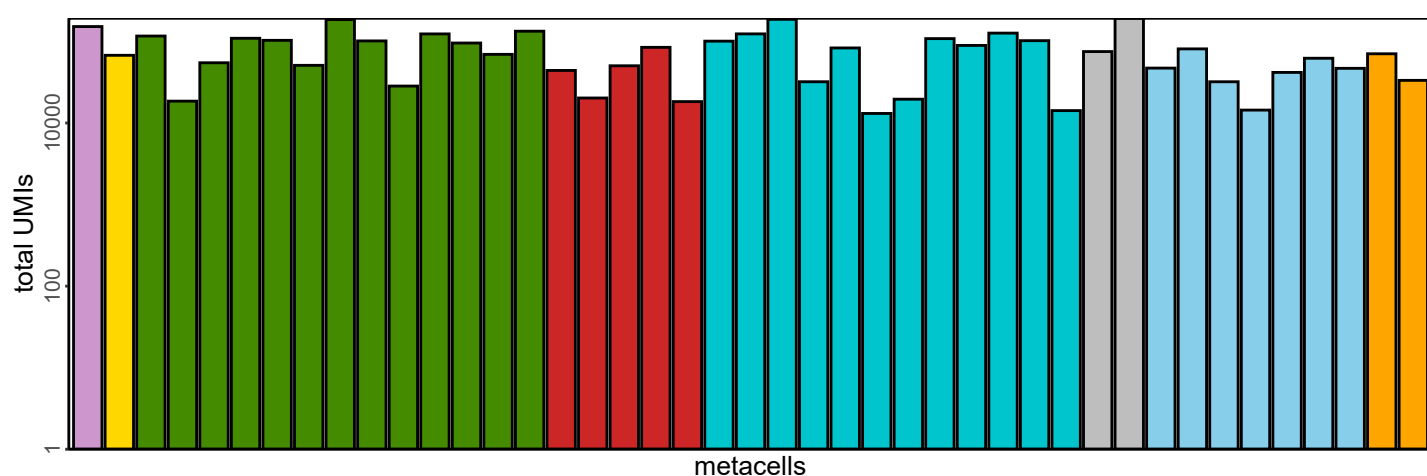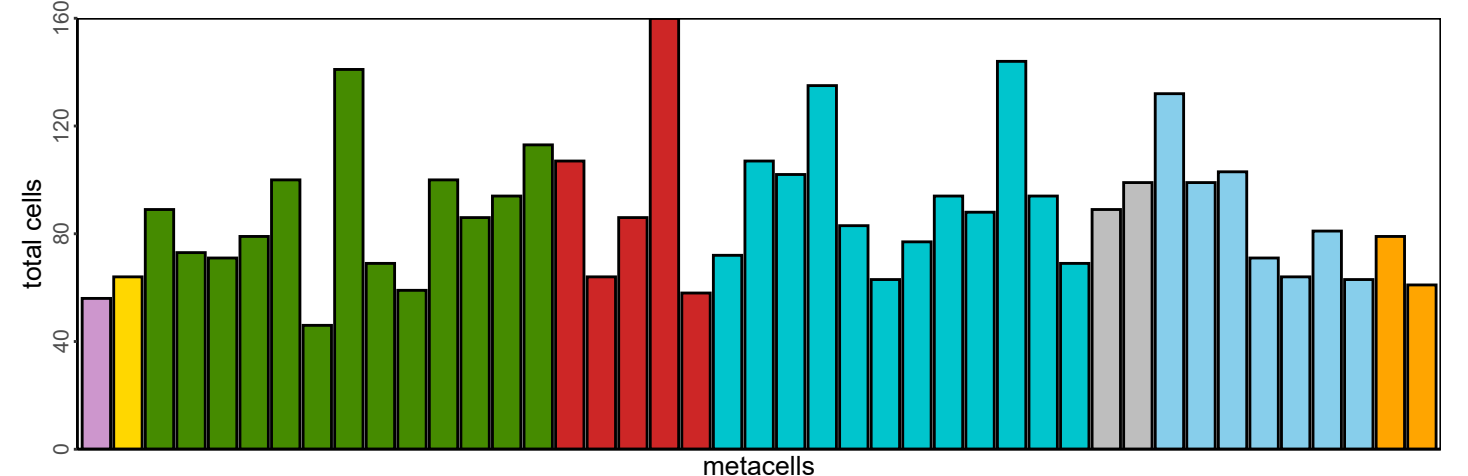



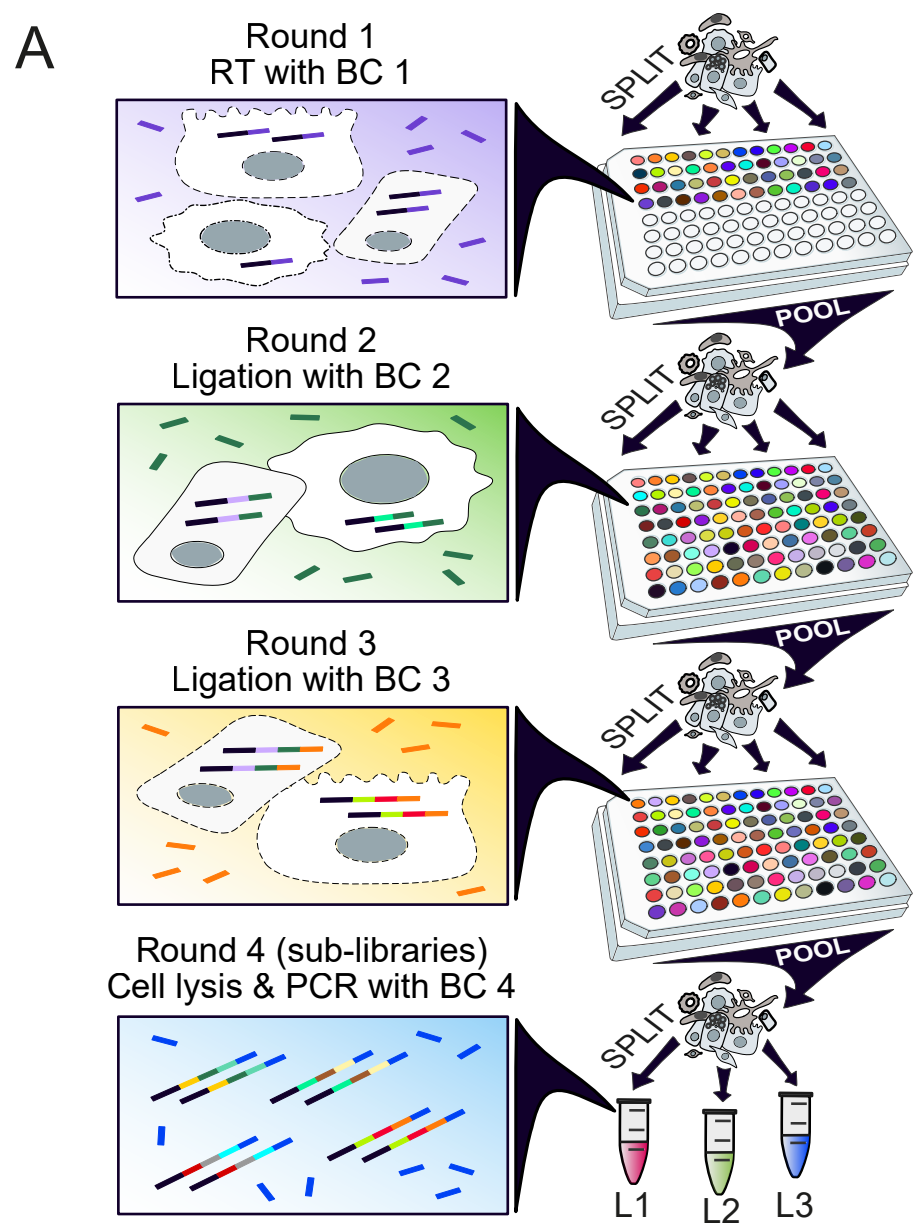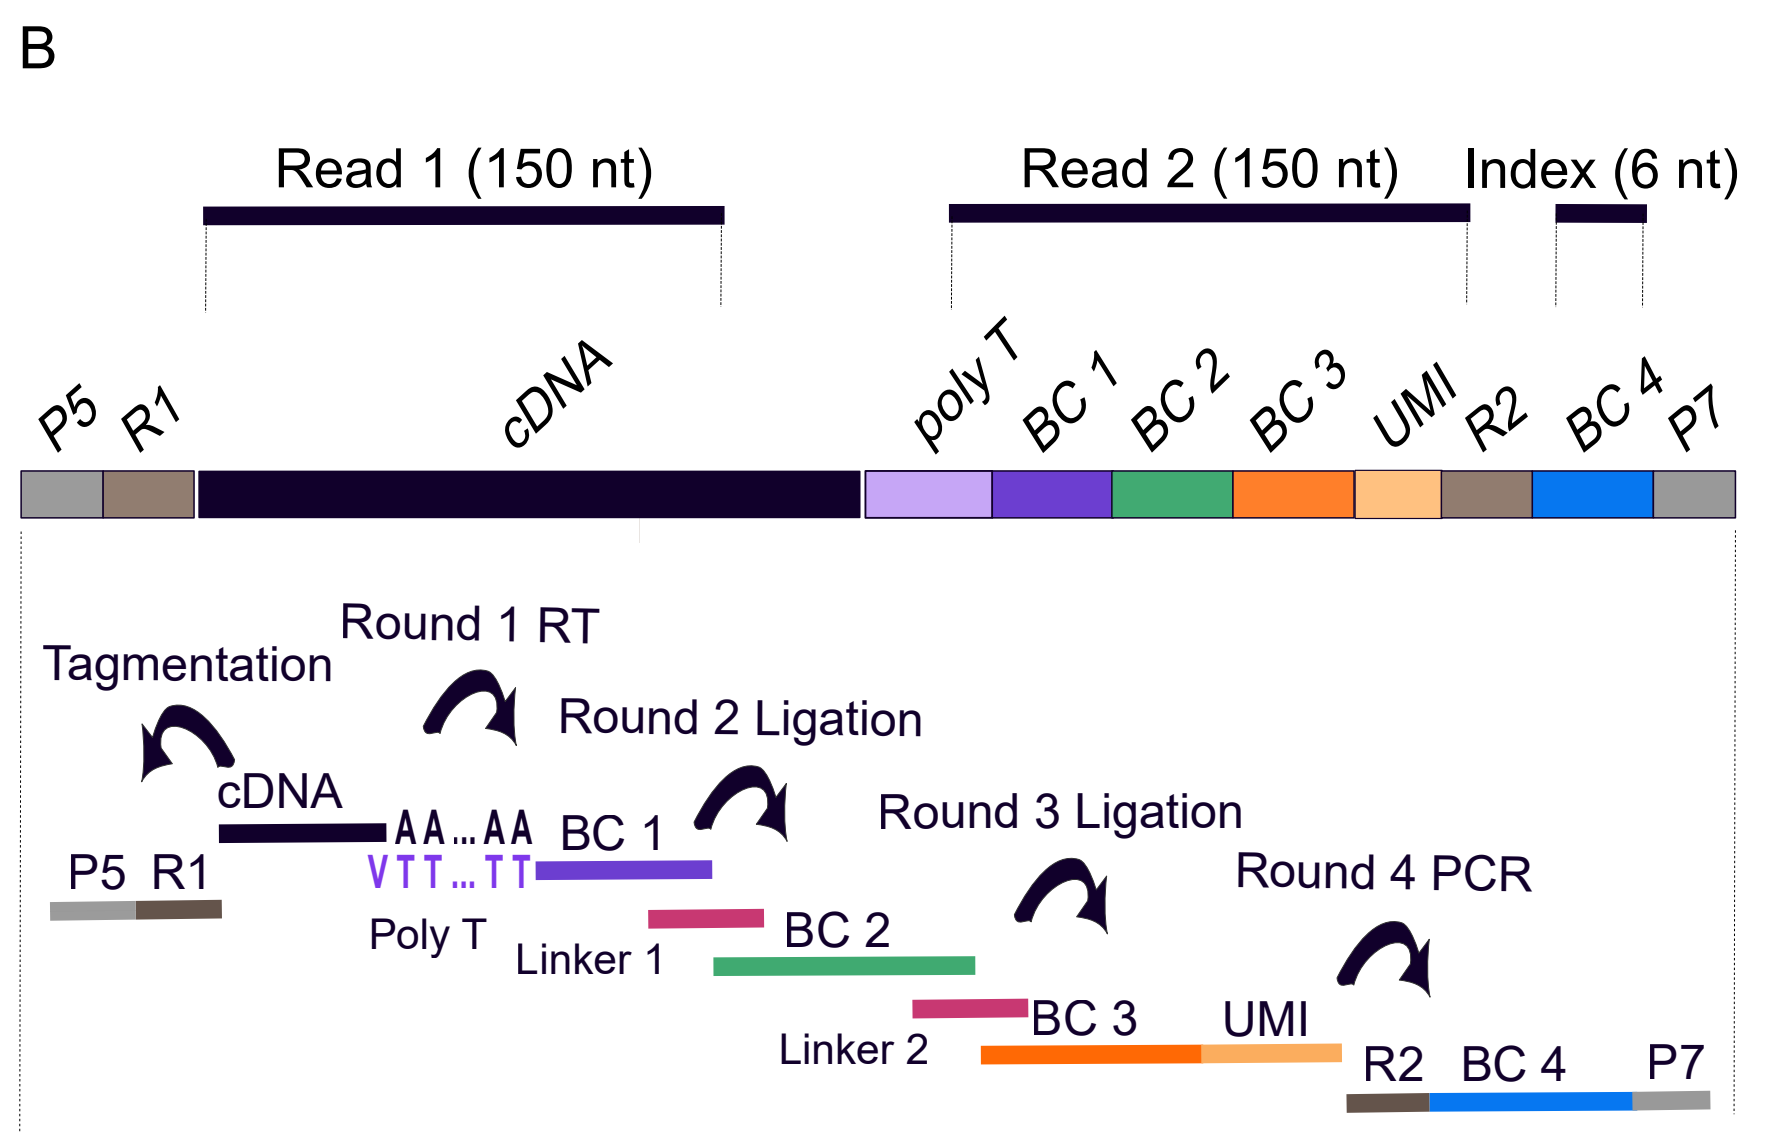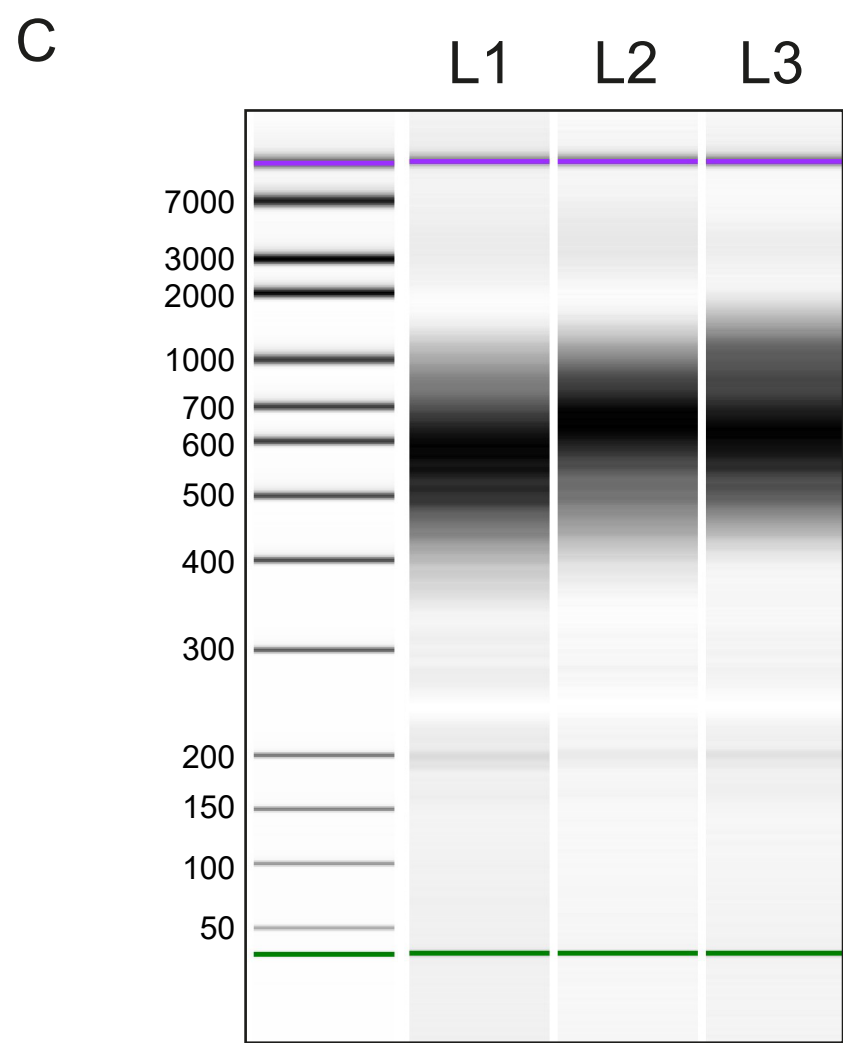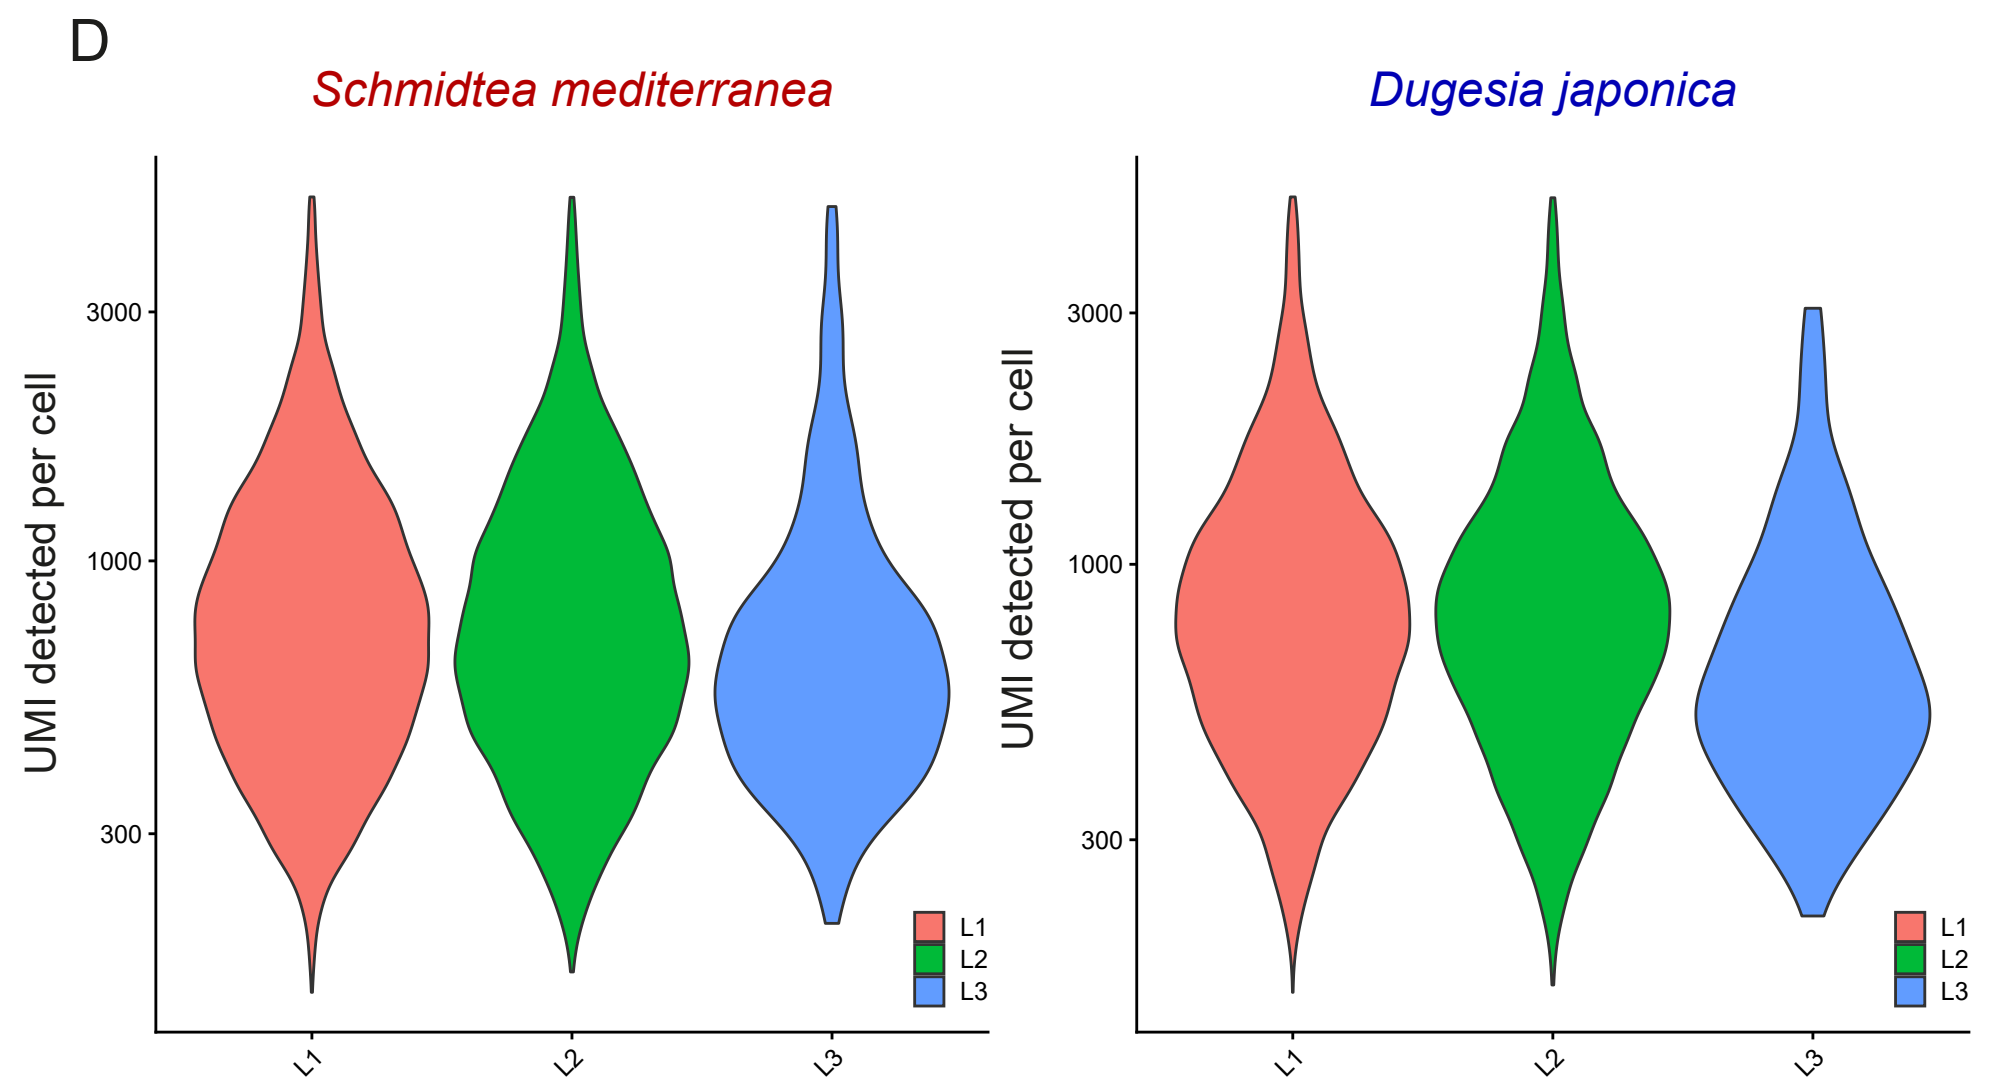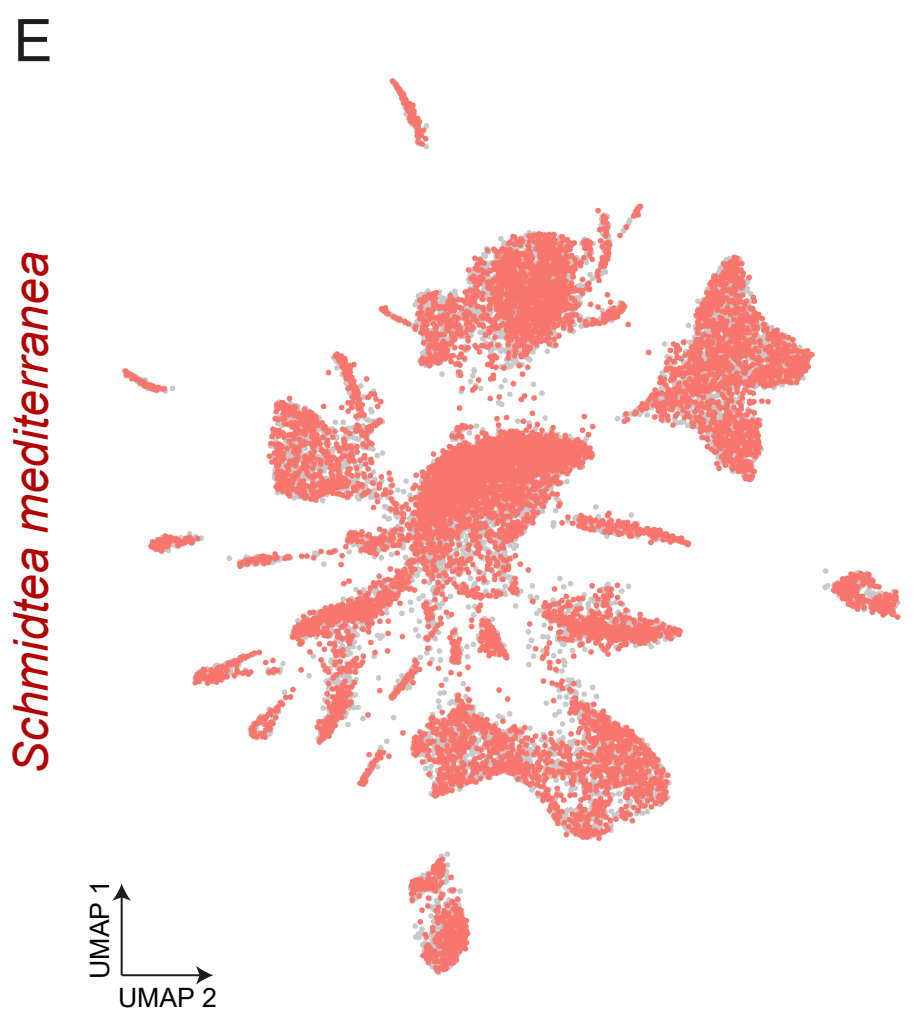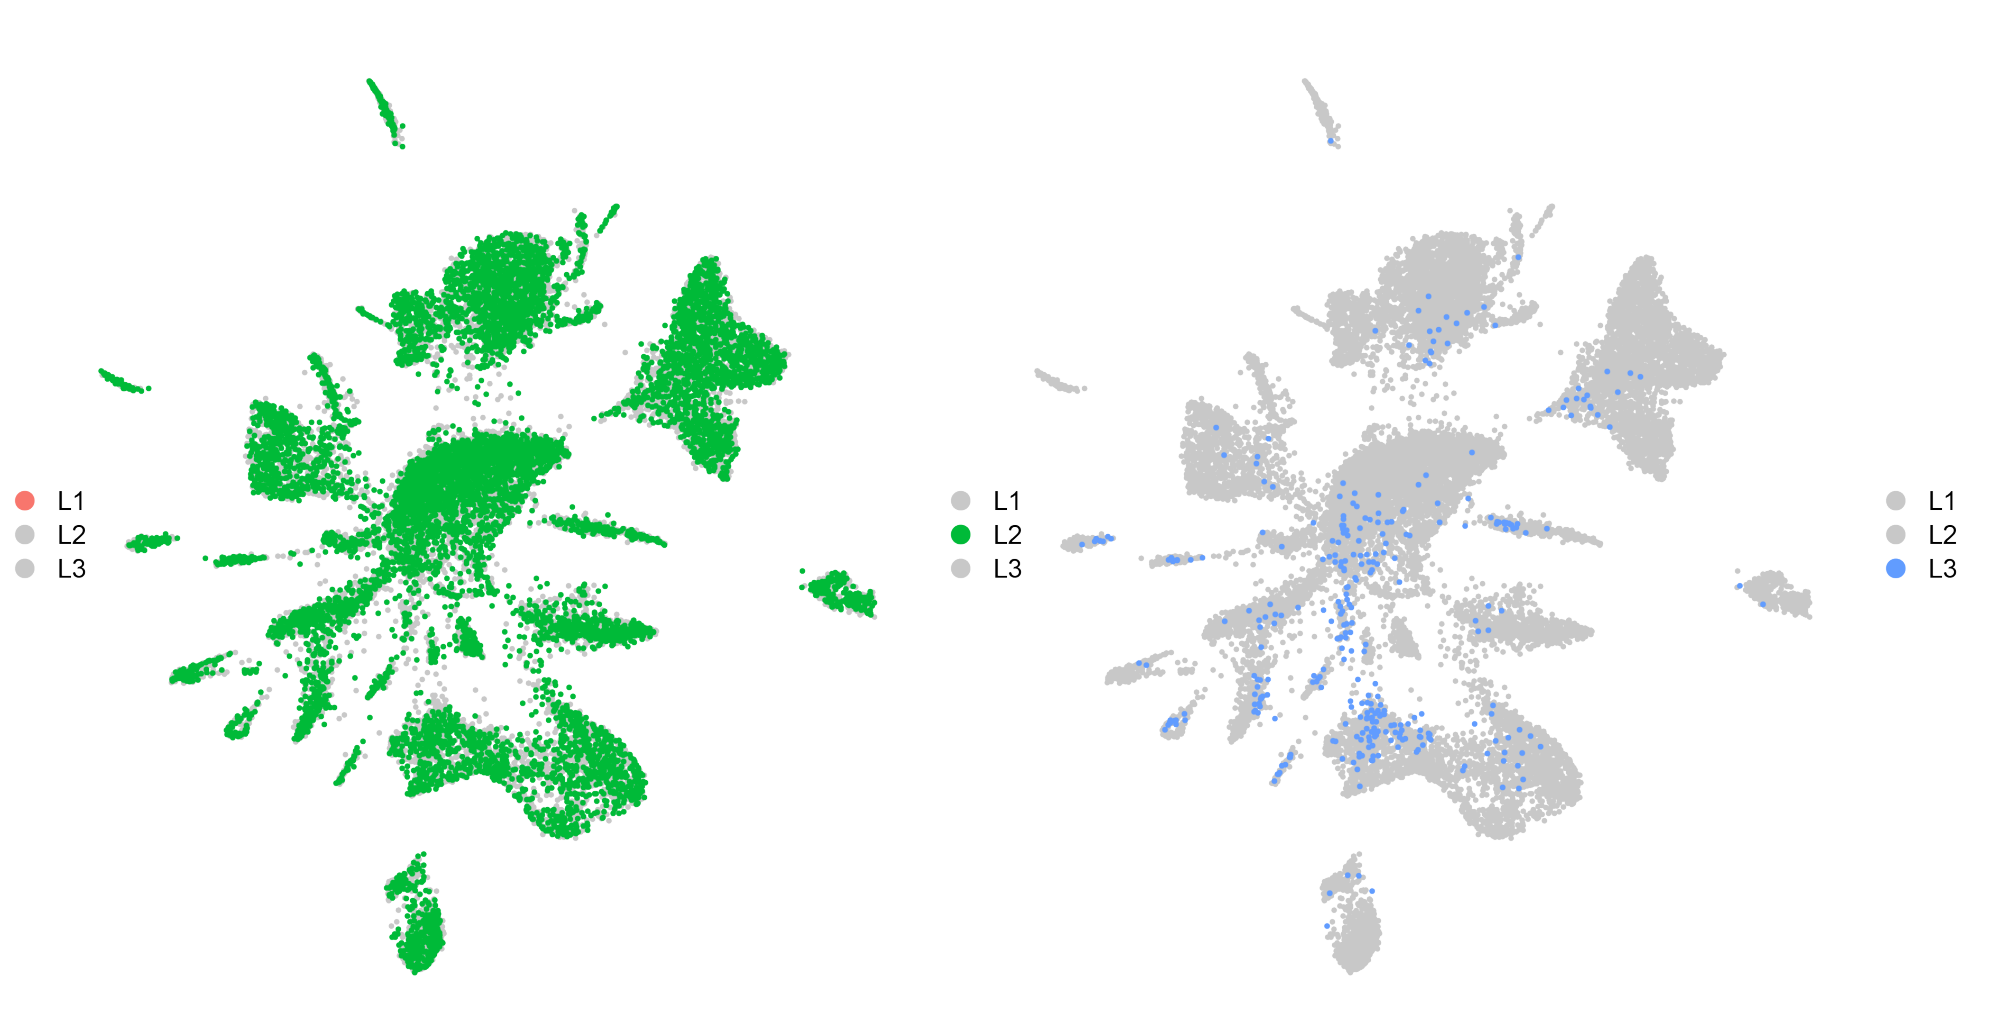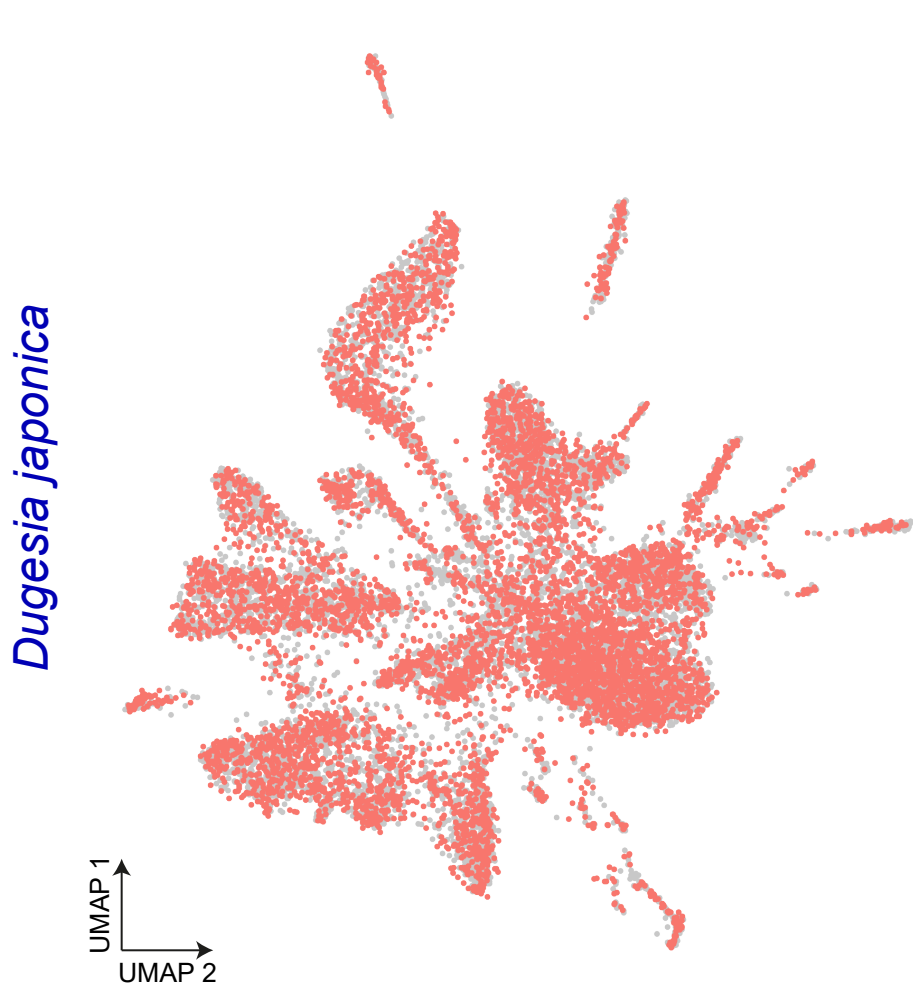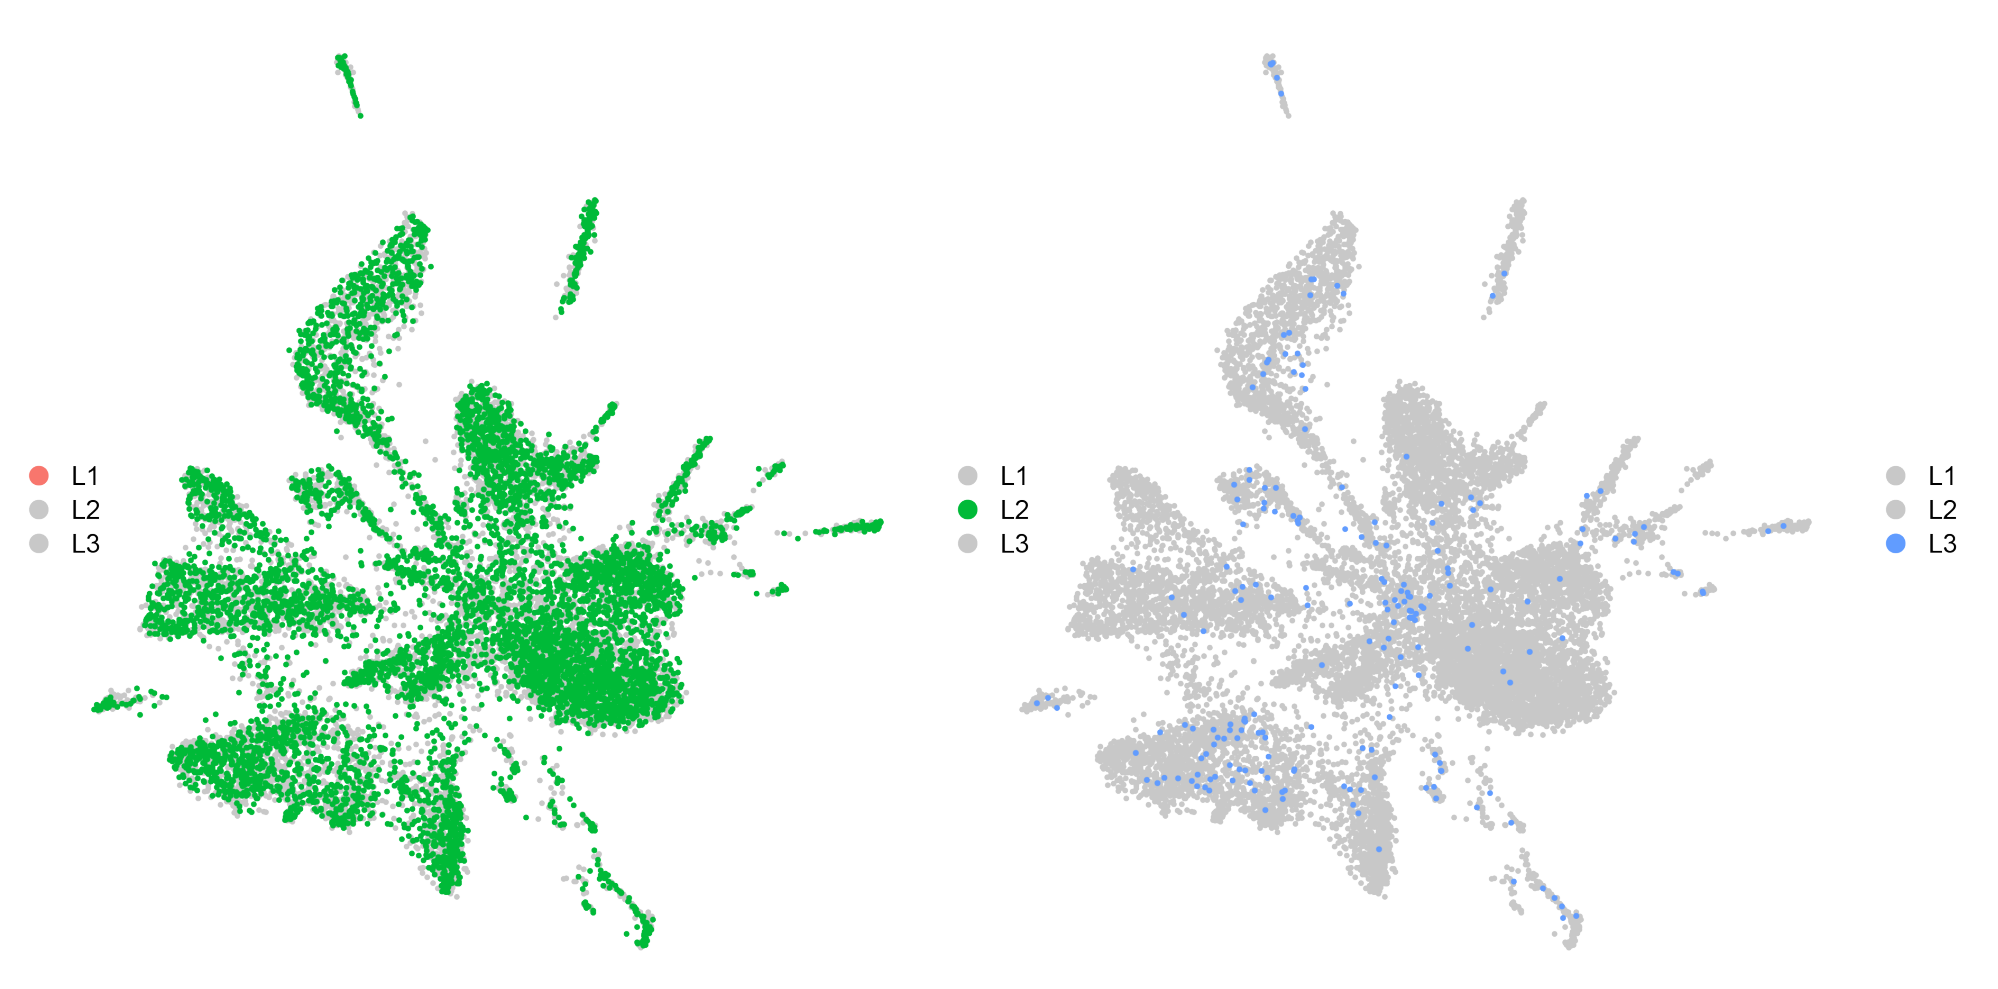



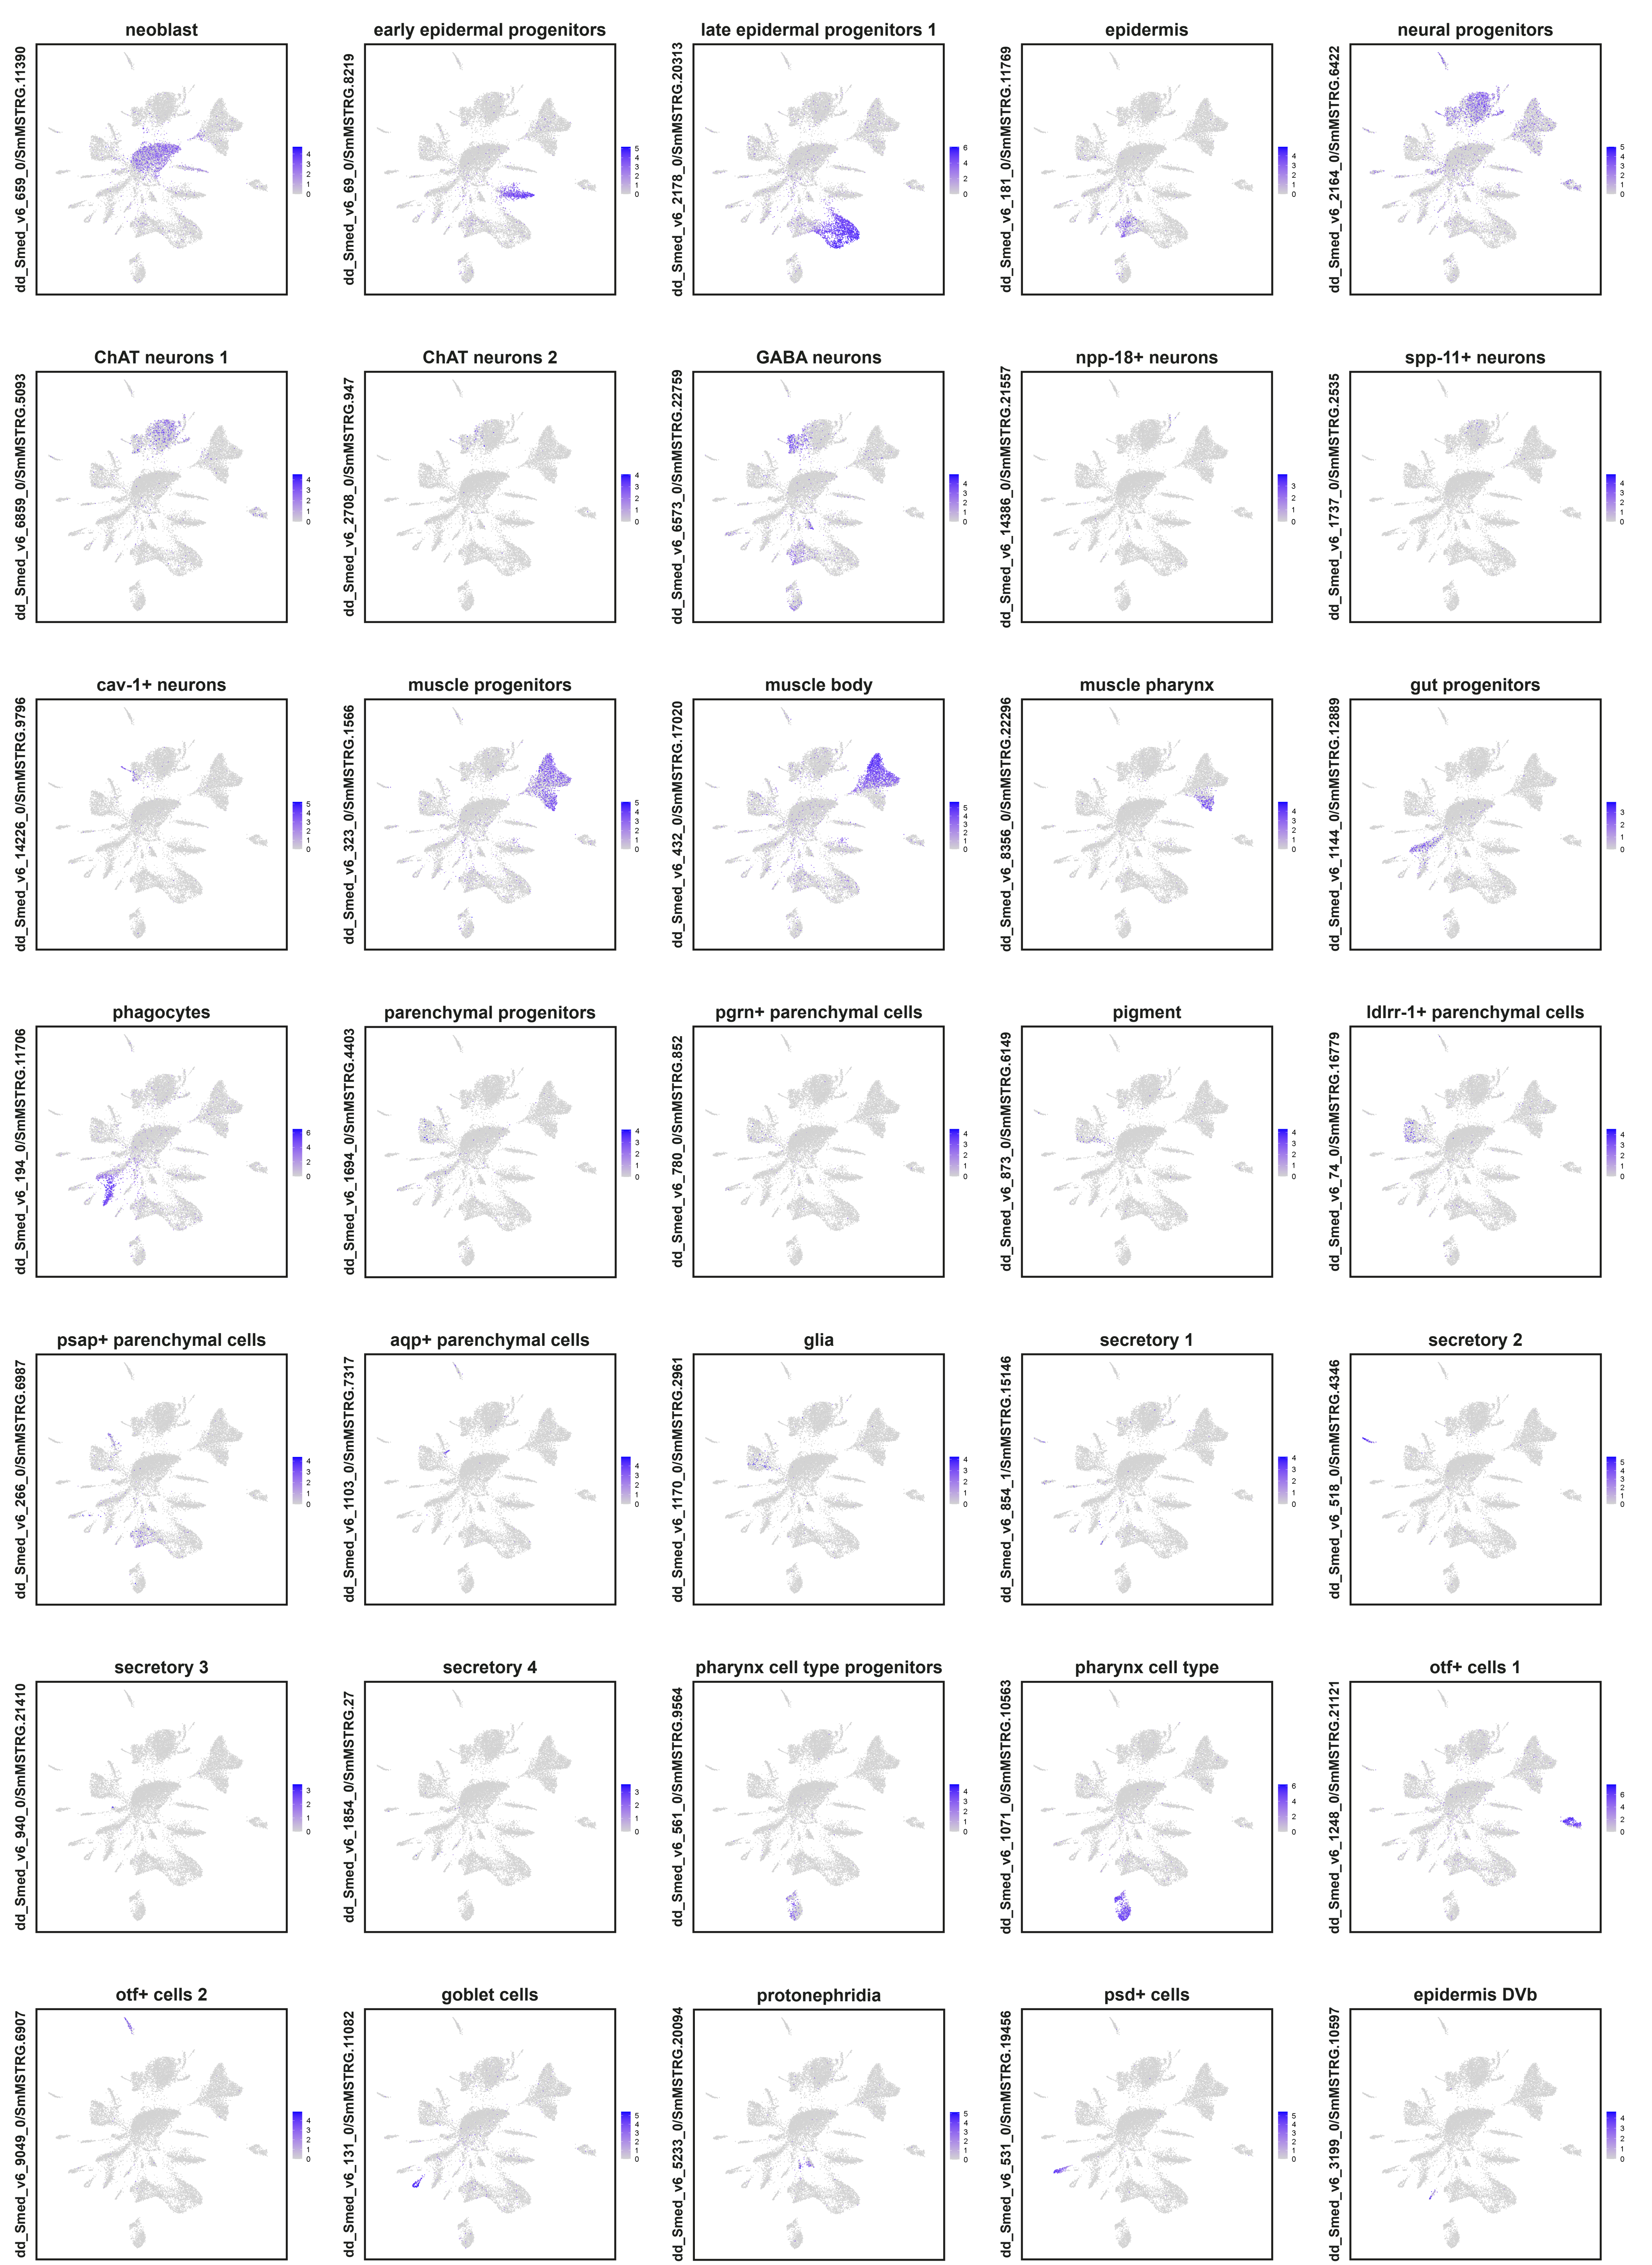



A

*Schmidtea mediterranea*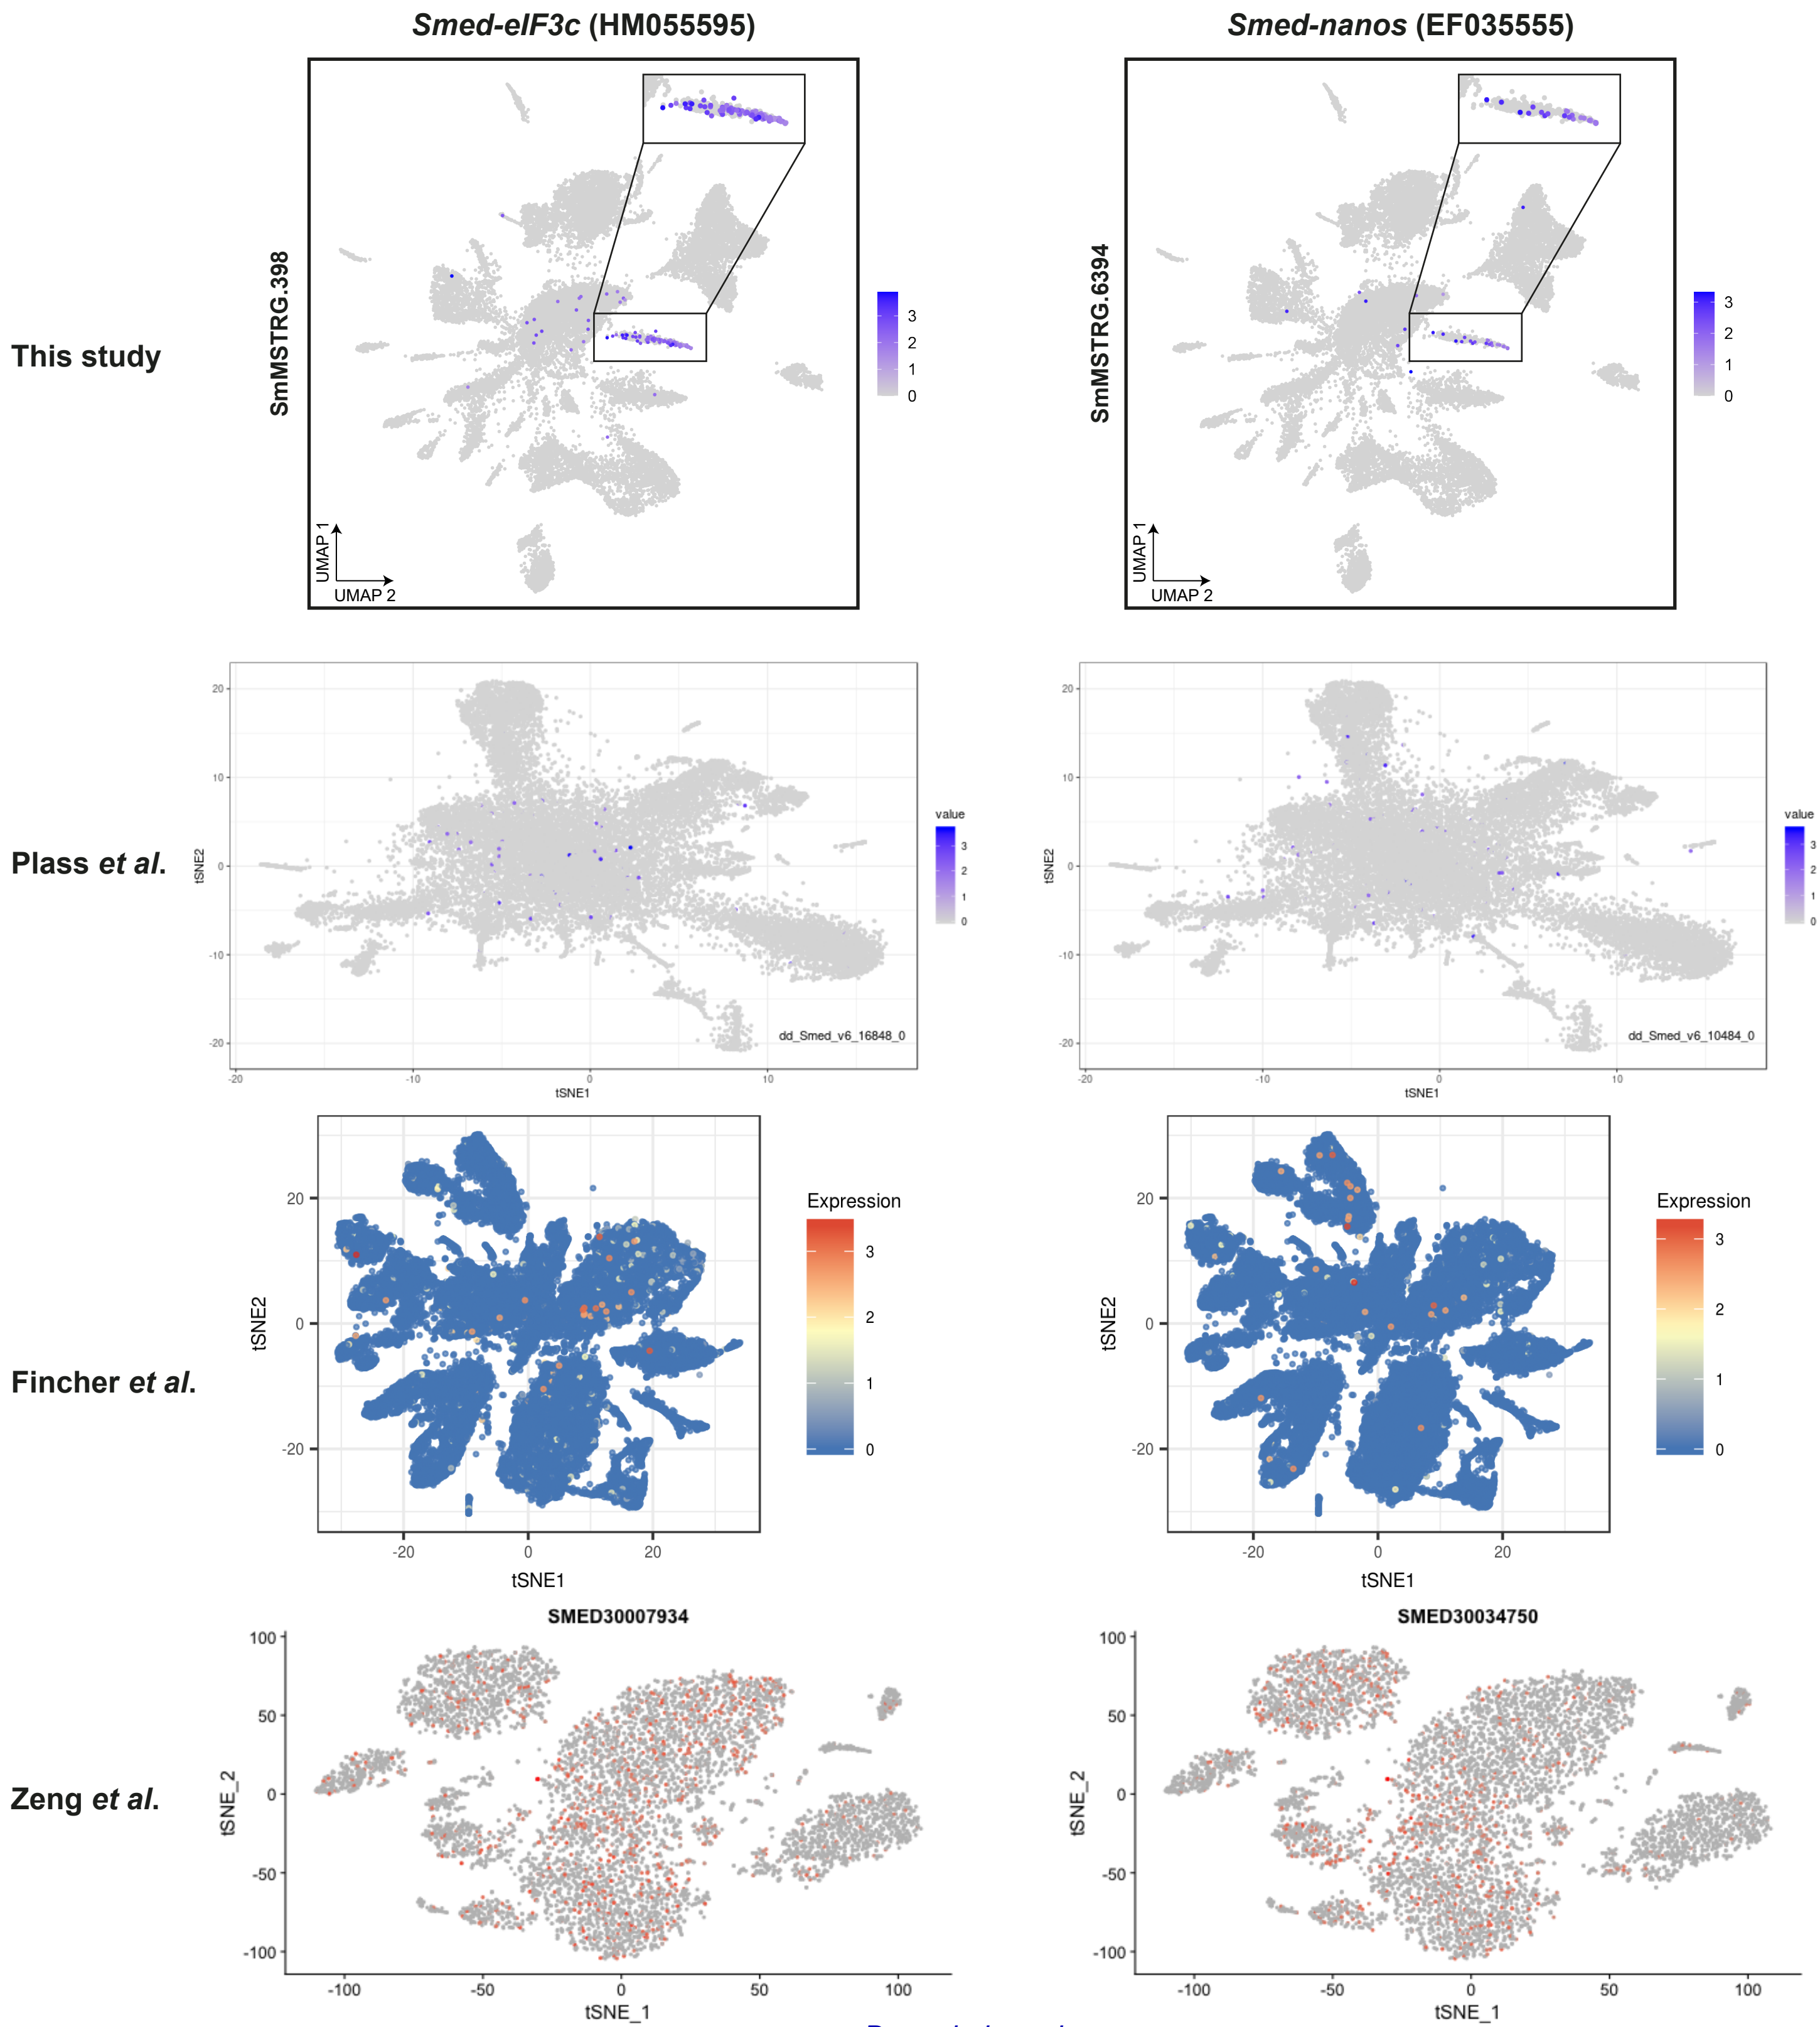

B

*Dugesia japonica*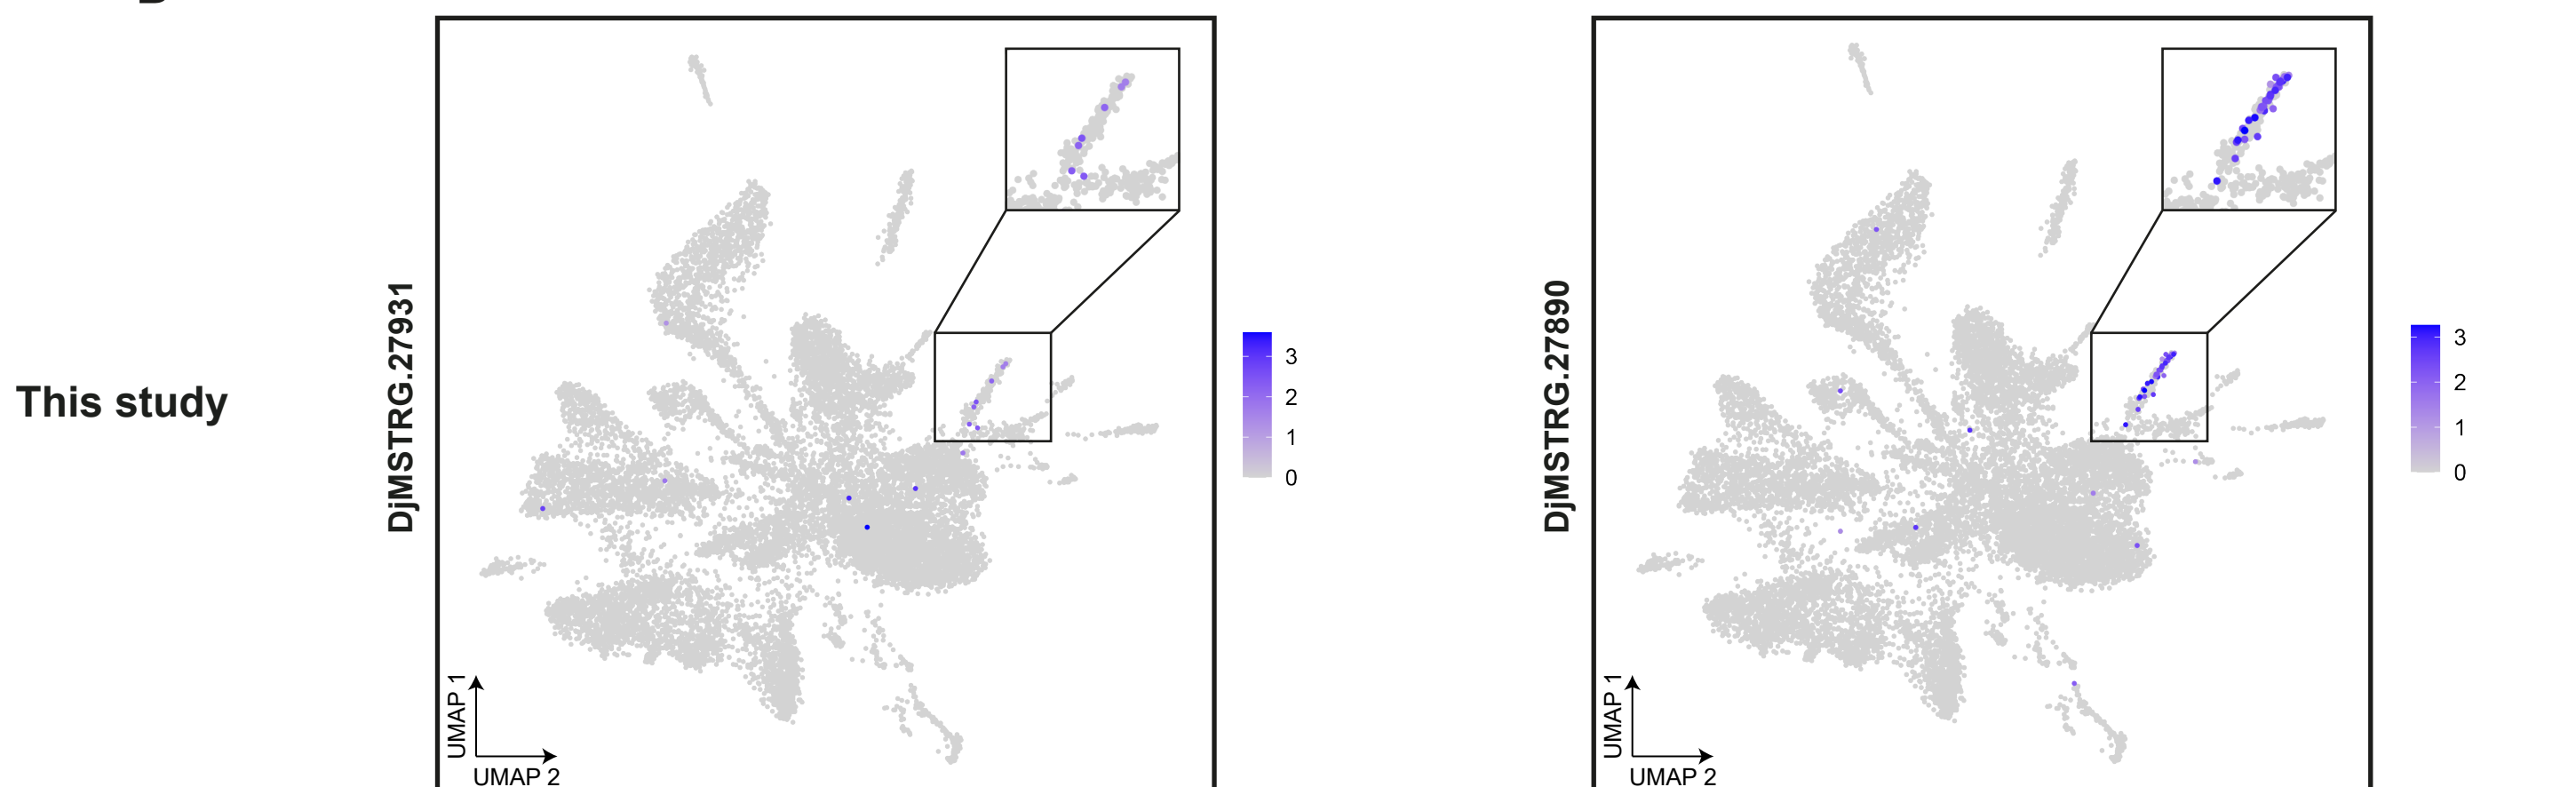



*Schmidtea mediterranea*

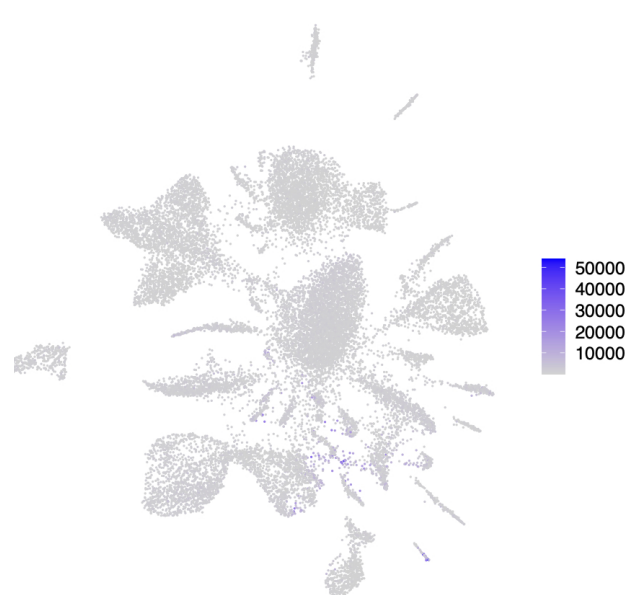

All cells kept  
(no >5000 UMI cutoff)

SmMSTRG6394  
*nanos*

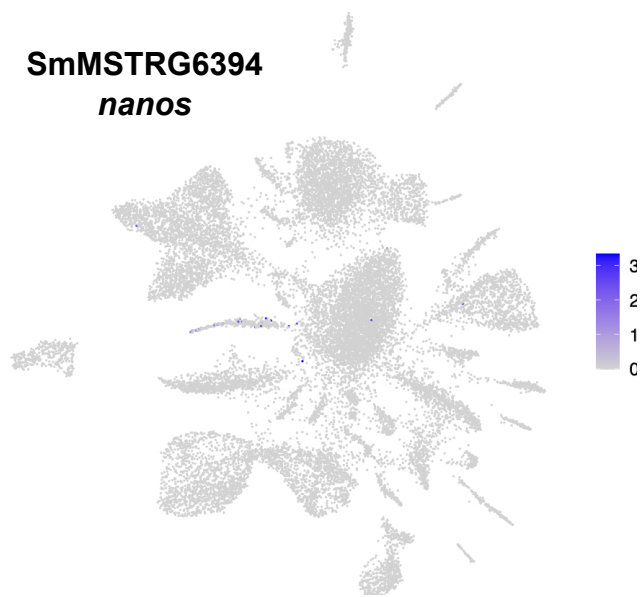

*nanos* expression  
(germ cell progenitor marker)

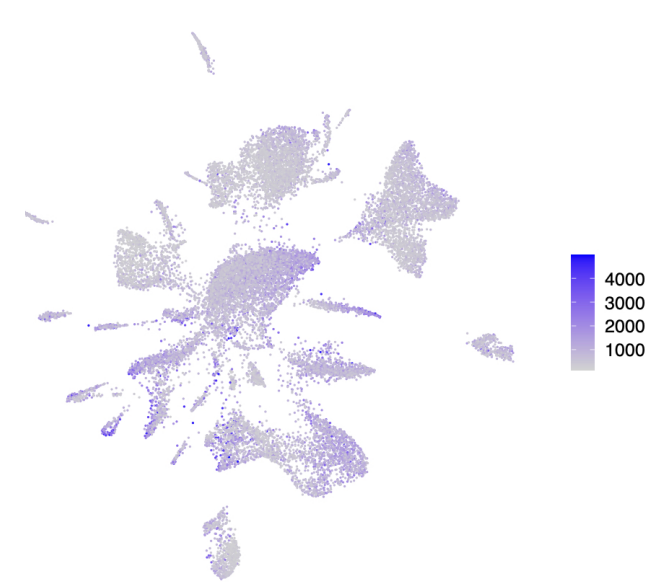

UMIs per cell (after >5000 UMI  
cell removal)

*Dugesia japonica*

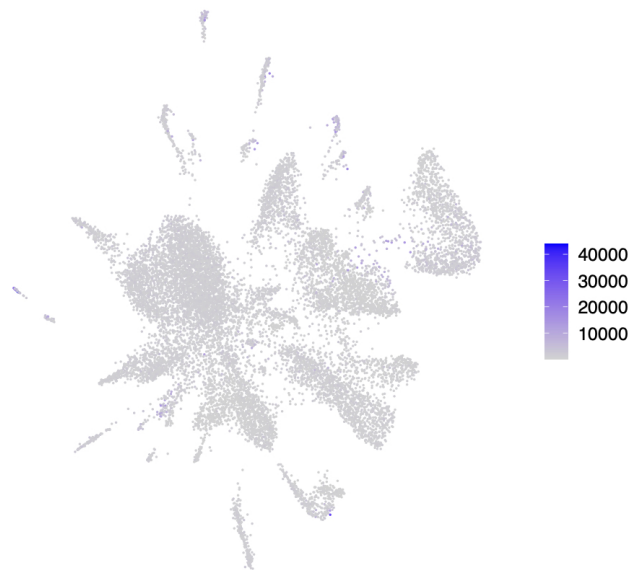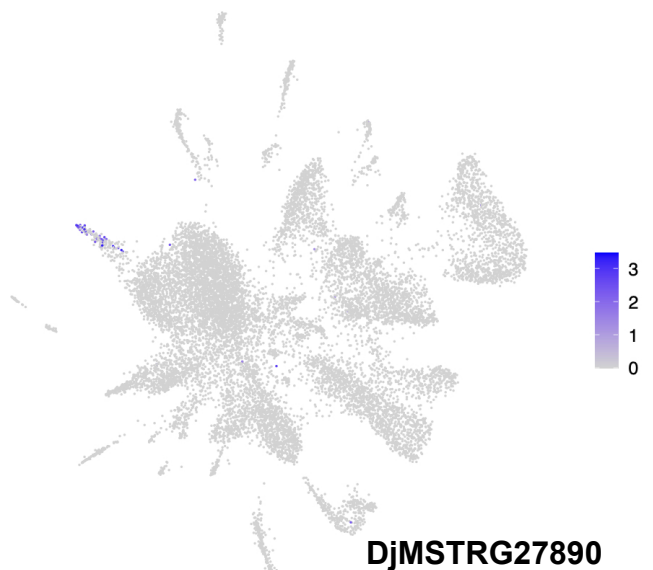

DjMSTRG27890  
*nanos*

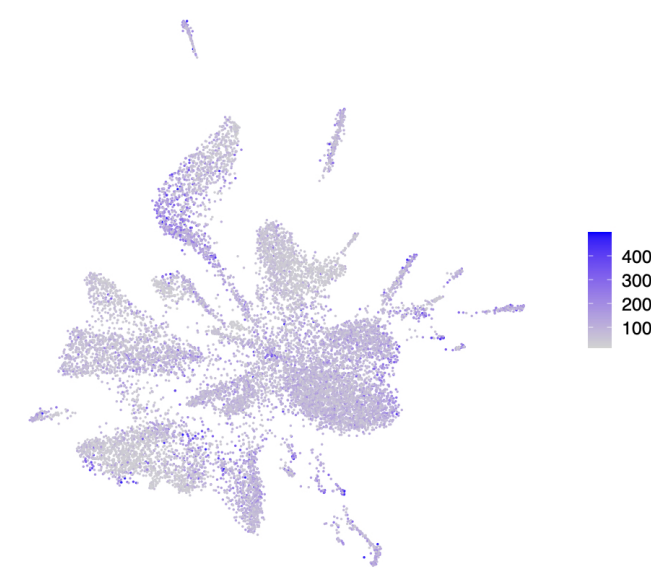

## Statistics on UMI and gene count:

|                                        | Plass et al (this reanalysis) | García-Castro et al (this dataset) |
|----------------------------------------|-------------------------------|------------------------------------|
| <b>All reads</b>                       | 1,200,007,715                 | 1,362,741,948                      |
| <b>Usable reads</b>                    | 1,200,007,715                 | 560,518,316                        |
| <b>Mapped reads (to genome)</b>        | 399,074,916                   | 470,671,761                        |
| <b>Mapped reads (to genes)</b>         | 343,409,649                   | 427,296,897                        |
| <b>Mapped reads (intronic content)</b> | 81,299,126                    | 161,656,944                        |
| <b>Total cells</b>                     | 21,610                        | 32,431                             |
| <b>Total UMIs</b>                      | 21,288,321                    | 29,557,182                         |
| <b>Total genes</b>                     | 12,233,806                    | 6,837,300                          |

### Statistics for each sample (nb in García-Castro, 2 species combined)

|                                       |          |          |
|---------------------------------------|----------|----------|
| <b>UMIs per cell (mean)</b>           | 985.1    | 911.4    |
| <b>Genes per cell (mean)</b>          | 566.1    | 210.8    |
| <b>UMIs per cell (median)</b>         | 696      | 741      |
| <b>Genes per cell (median)</b>        | 452      | 179      |
| <b>UMI per million raw reads</b>      | 17,740.2 | 21,689.5 |
| <b>Genes per million raw reads</b>    | 10,194.8 | 5,017.3  |
| <b>UMI per million usable reads</b>   | 17,740.2 | 52,731.9 |
| <b>Genes per million usable reads</b> | 10,194.8 | 12,198.2 |

### Statistics after downsampling all García-Castro reads to 1,200,007,715 (Plass total)

|                                |            |            |
|--------------------------------|------------|------------|
| <b>UMIs</b>                    | 21,288,321 | 27,939,680 |
| <b>Genes</b>                   | 12,233,806 | 6,581,986  |
| <b>UMIs per cell (mean)</b>    | 939.8      | 861.5      |
| <b>Genes per cell (mean)</b>   | 541.8      | 203.0      |
| <b>UMIs per cell (median)</b>  | 696        | 700        |
| <b>Genes per cell (median)</b> | 452        | 172        |
| <b>UMI per million reads</b>   | 17,740.2   | 23,282.9   |
| <b>Genes per million reads</b> | 10,194.8   | 5,485.0    |

### Statistics after downsampling both to 10k mapped reads per cell

|                                |             |             |
|--------------------------------|-------------|-------------|
| <b>Mapped Reads</b>            | 216,100,000 | 324,310,000 |
| <b>UMIs</b>                    | 17,858,300  | 28,840,440  |
| <b>Genes</b>                   | 10,569,570  | 6,719,416   |
| <b>UMIs per cell (mean)</b>    | 826.4       | 889.3       |
| <b>Genes per cell (mean)</b>   | 489.1       | 207.2       |
| <b>UMIs per cell (median)</b>  | 594         | 723         |
| <b>Genes per cell (median)</b> | 394         | 176         |
| <b>UMI per million reads</b>   | 82,639.1    | 88,928.6    |
| <b>Genes per million reads</b> | 48,910.6    | 20,719.1    |

García-Castro downsampled to Plass Total

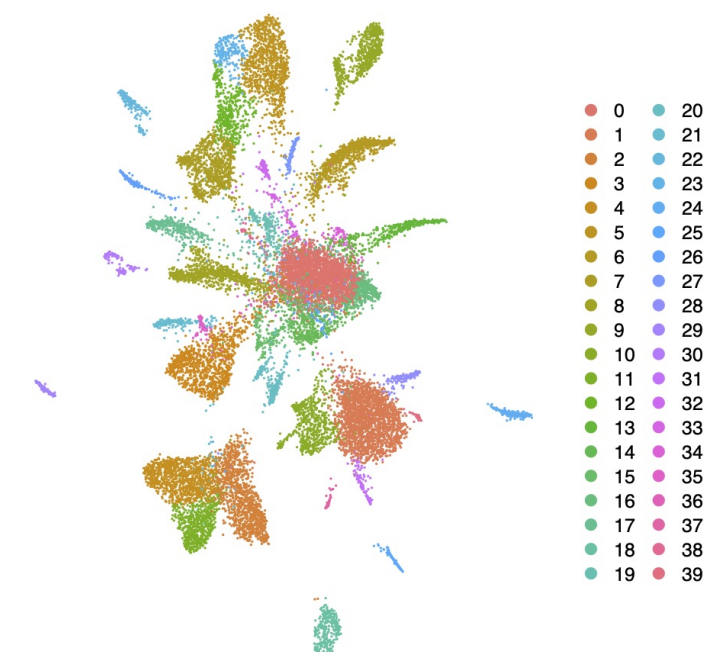

García-Castro Downsampled to 10k Per Cell

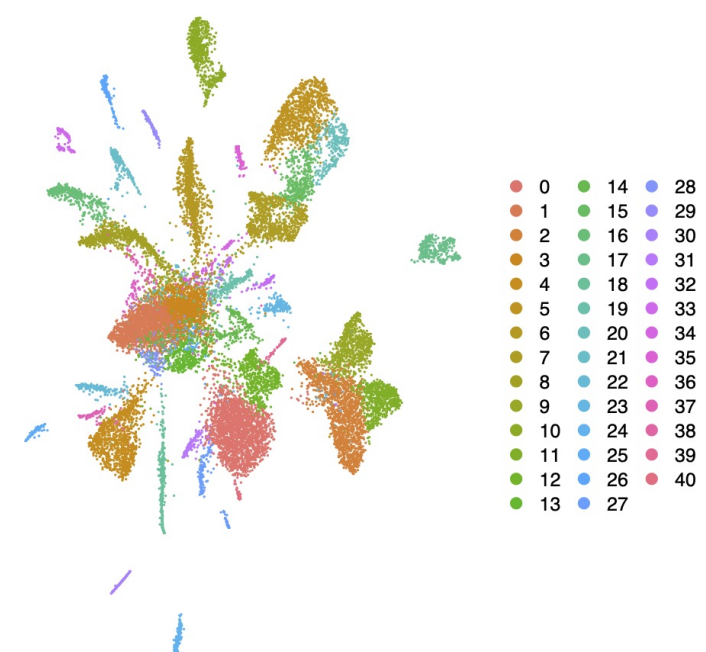

Plass downsampled to 10k Mapped Per Cell

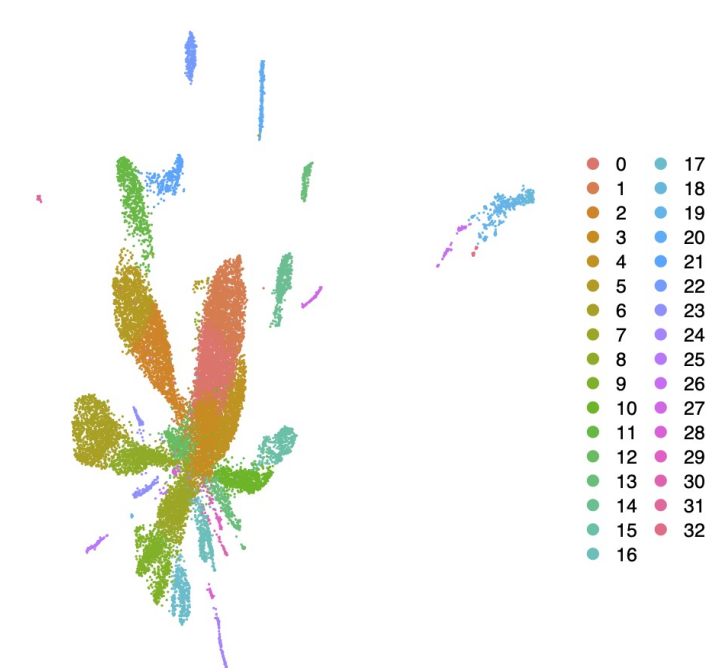

|                                   | Number of genes<br>differentially expressed in<br>ACME-dissociated dataset | Number of overlaps with<br>Trypsin dissociated<br>dataset (Plass et al) | Percentage<br>overlap | Neoblast cluster numbers<br>(ACME-dissociated<br>dataset, Garcia-Castro) | Test clusters (ACME-<br>dissociated dataset, Garcia-<br>Castro et al) | Neoblast cluster numbers<br>(Trypsin dissociated<br>dataset, Plass et al) | Test clusters (Trypsin<br>dissociated dataset,<br>Plass et al) |
|-----------------------------------|----------------------------------------------------------------------------|-------------------------------------------------------------------------|-----------------------|--------------------------------------------------------------------------|-----------------------------------------------------------------------|---------------------------------------------------------------------------|----------------------------------------------------------------|
| Neoblast vs GABA neuron           | 333                                                                        | 281                                                                     | 84.4                  | 1, 2, 15, 17, 40                                                         | 10                                                                    | 0, 1, 4, 6, 12, 17, 25, 33                                                | 16                                                             |
| Neoblast vs differentiated Goblet | 365                                                                        | 304                                                                     | 83.3                  | 1, 2, 15, 17, 40                                                         | 32                                                                    | 0, 1, 4, 6, 12, 17, 25, 33                                                | 37                                                             |
| Neoblast vs muscle                | 354                                                                        | 272                                                                     | 76.8                  | 1, 2, 15, 17, 40                                                         | 3, 6, 11                                                              | 0, 1, 4, 6, 12, 17, 25, 33                                                | 7, 8, 19                                                       |
| Neoblast vs Olf                   | 429                                                                        | 354                                                                     | 82.5                  | 1, 2, 15, 17, 40                                                         | 16, 21                                                                | 0, 1, 4, 6, 12, 17, 25, 33                                                | 28, 29                                                         |
| Neoblast vs Pharynx               | 421                                                                        | 313                                                                     | 74.3                  | 1, 2, 15, 17, 40                                                         | 13, 23                                                                | 0, 1, 4, 6, 12, 17, 25, 33                                                | 26                                                             |

Differential expression analysis performed in Seurat with FindMarkers, with a Wilcoxon Rank Sum test, logfc.threshold of 0.25, and a min.pct value of 0.1

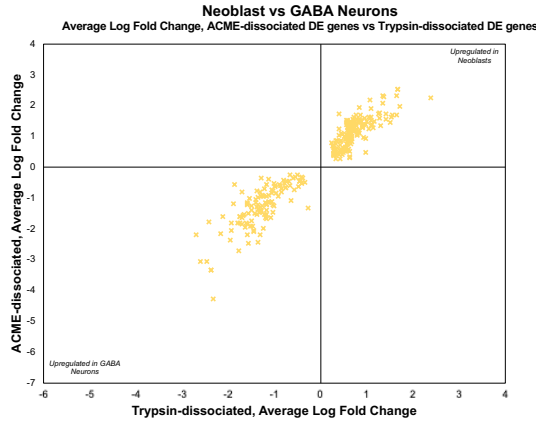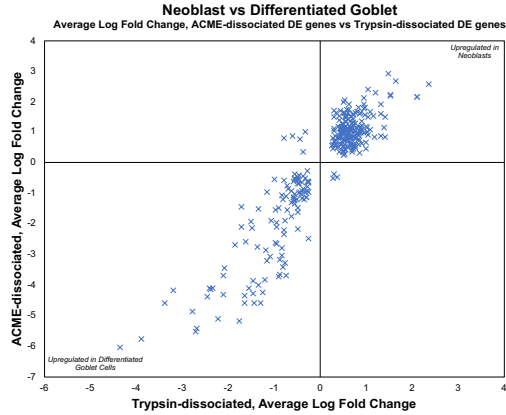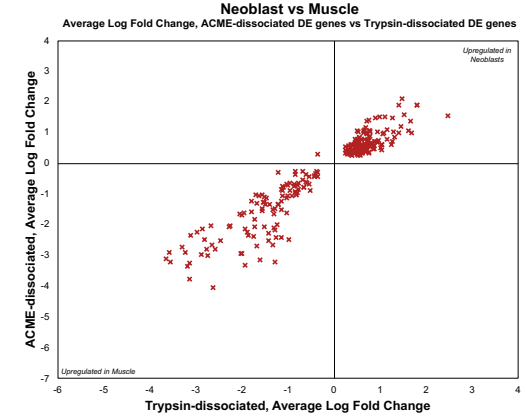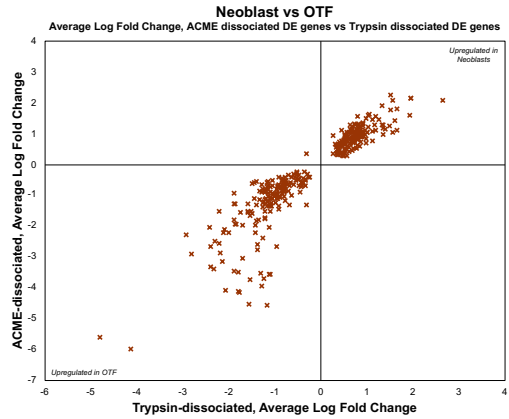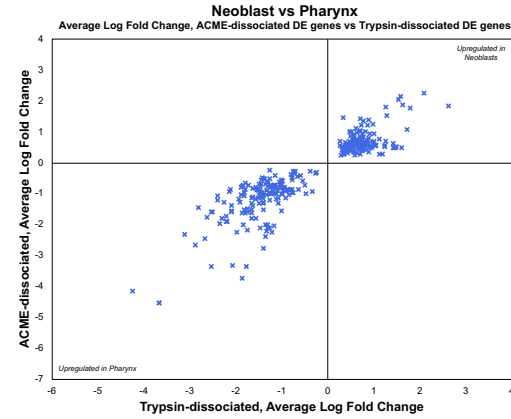

A

This study (19,025 cells)

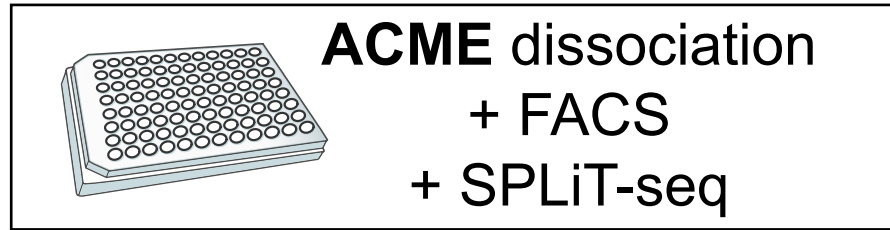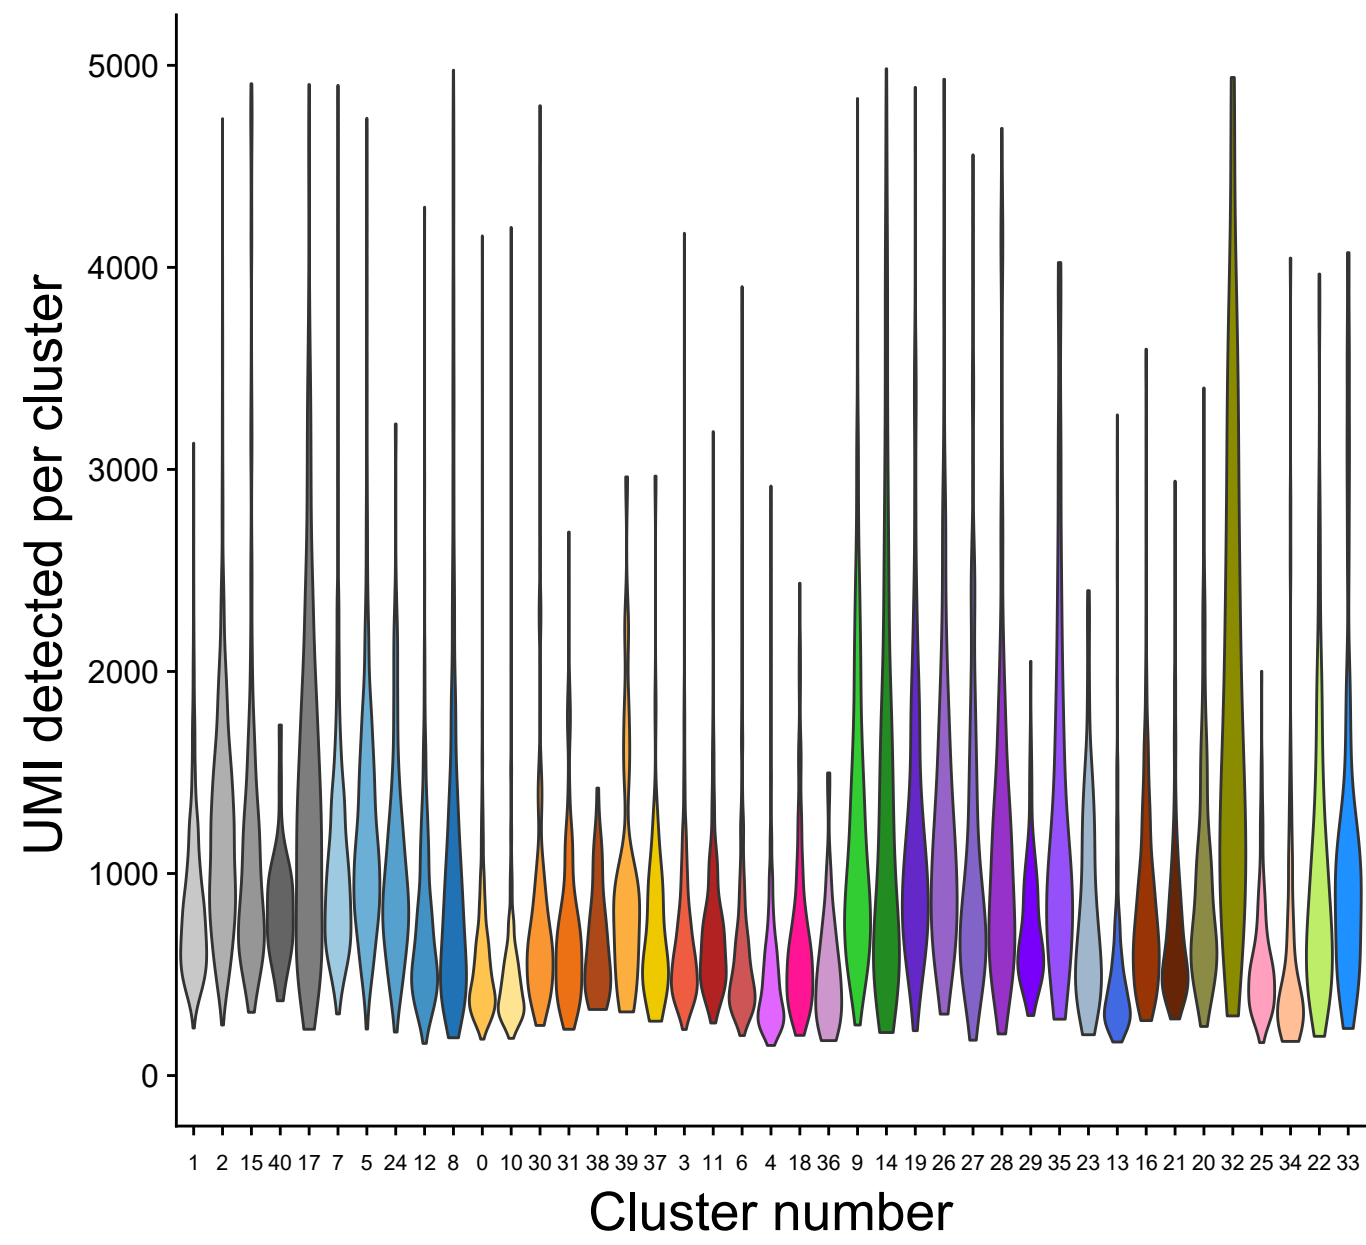Plass *et al.* Science 2018 (21,610 cells)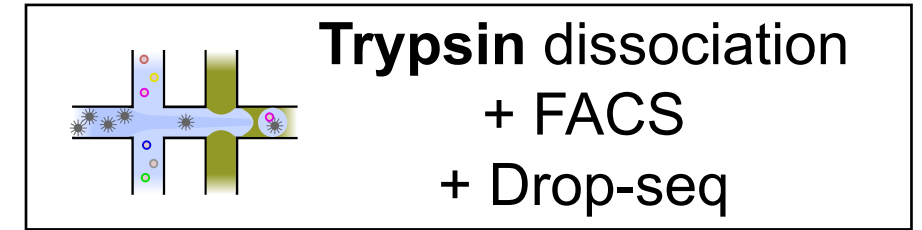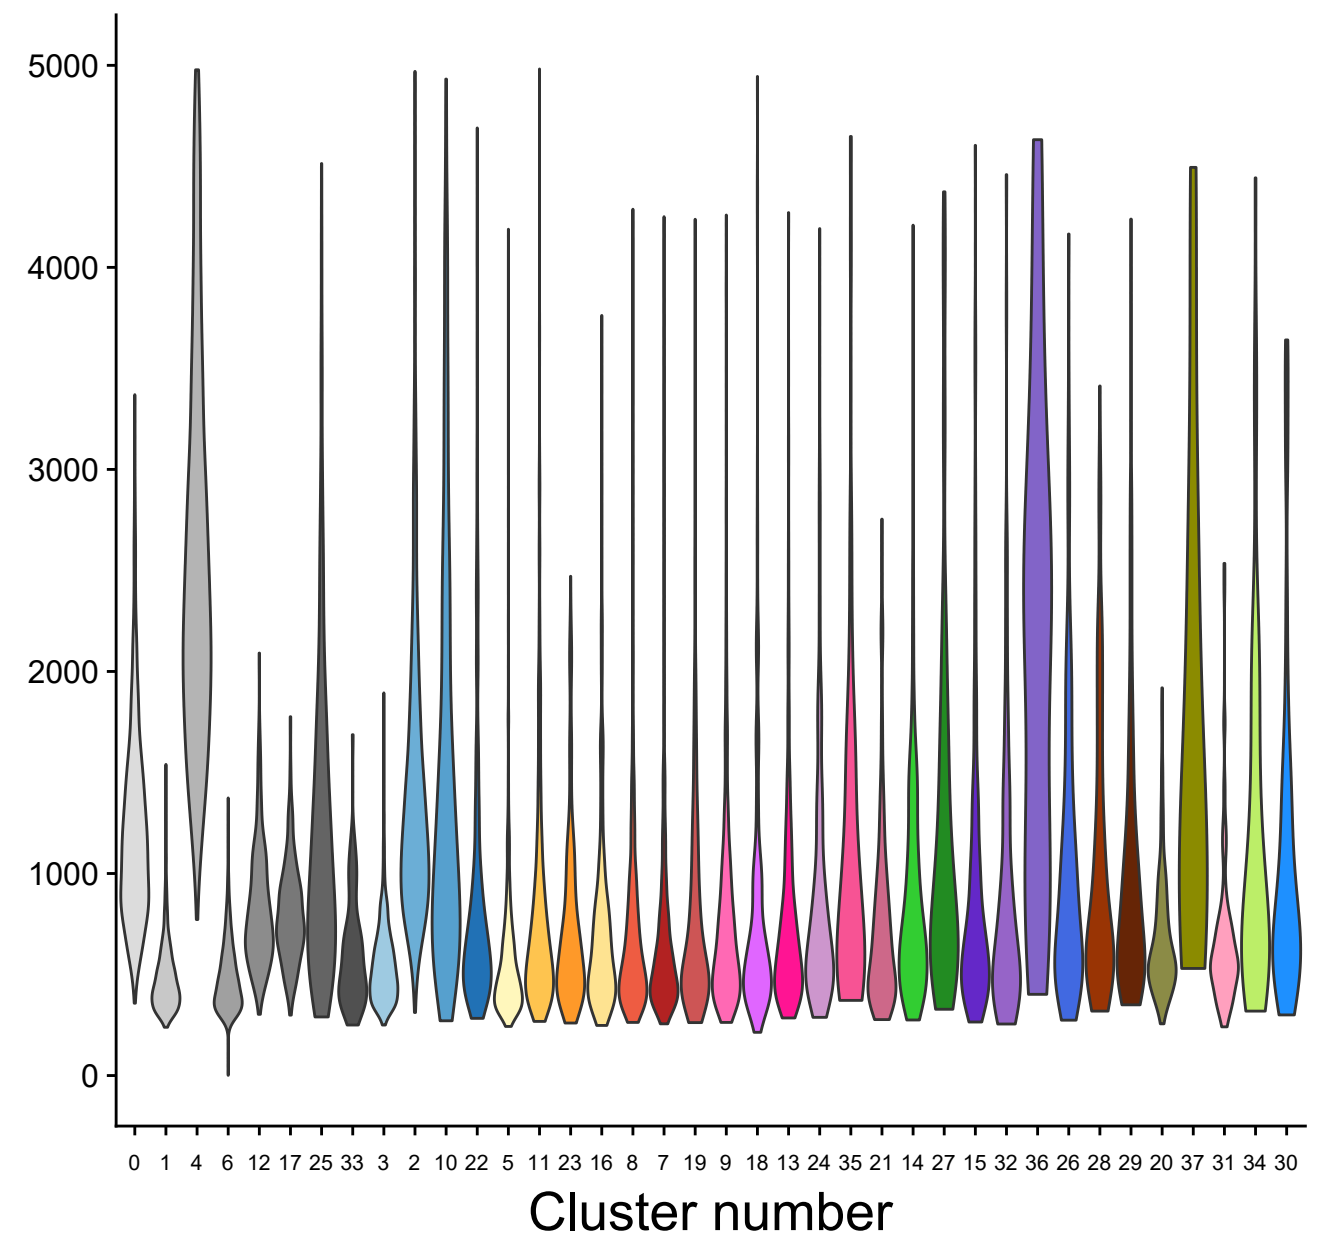

B

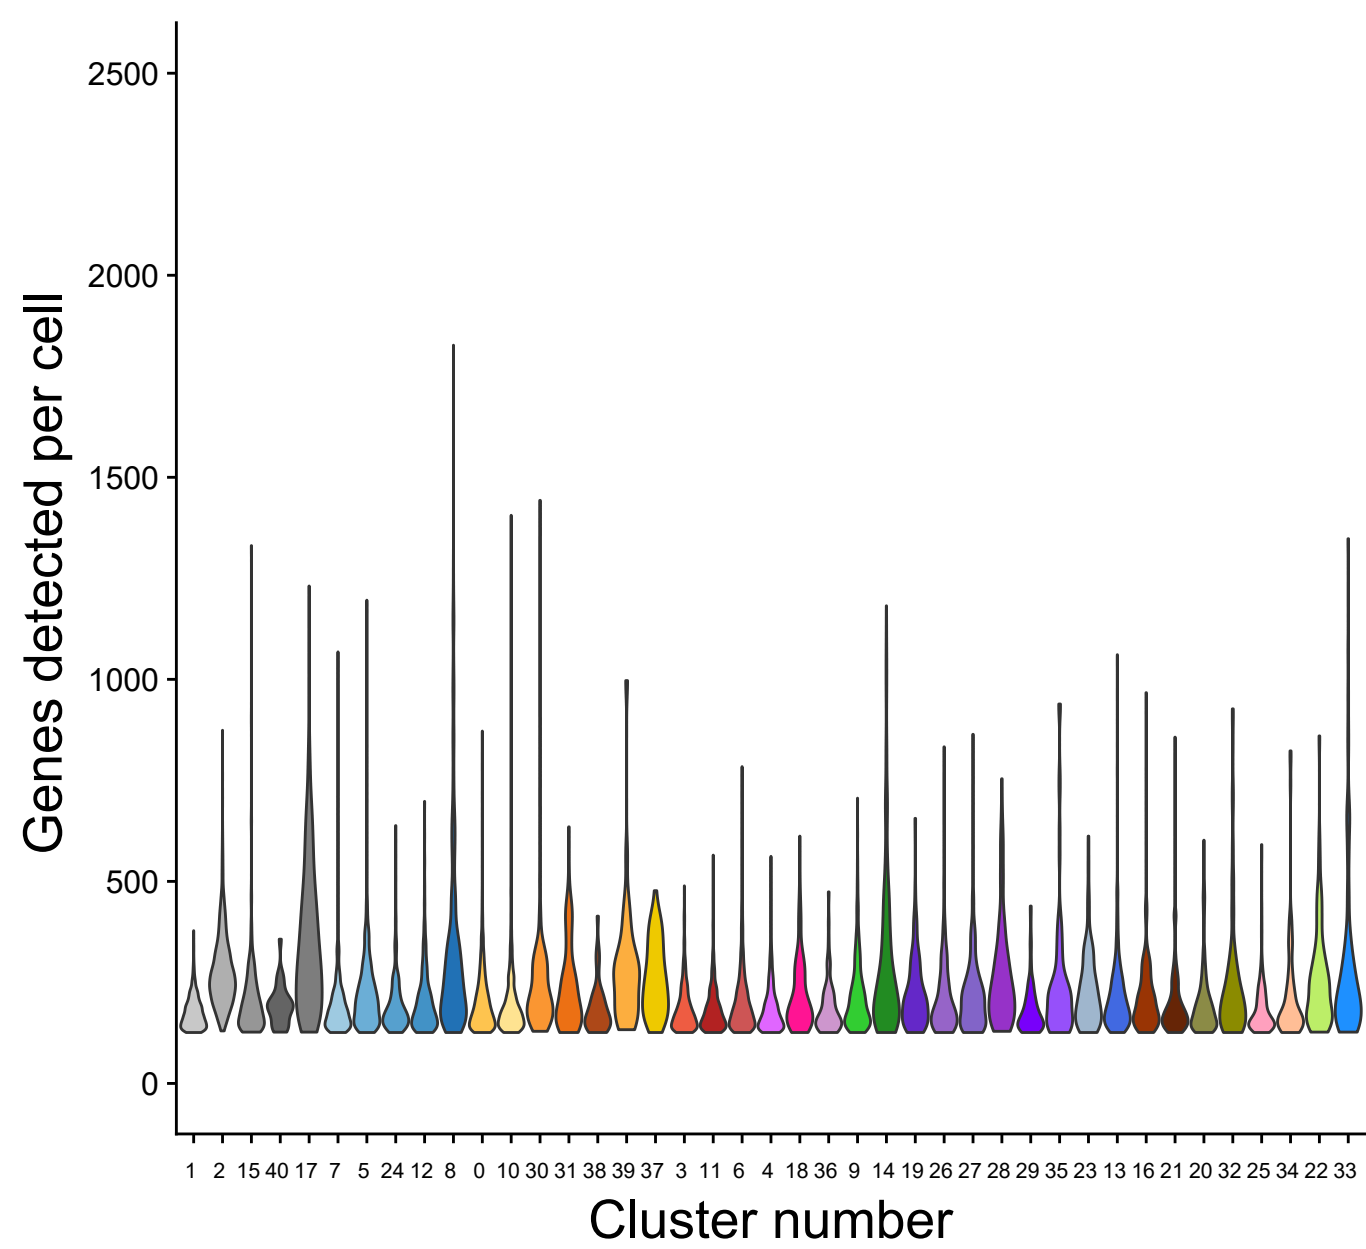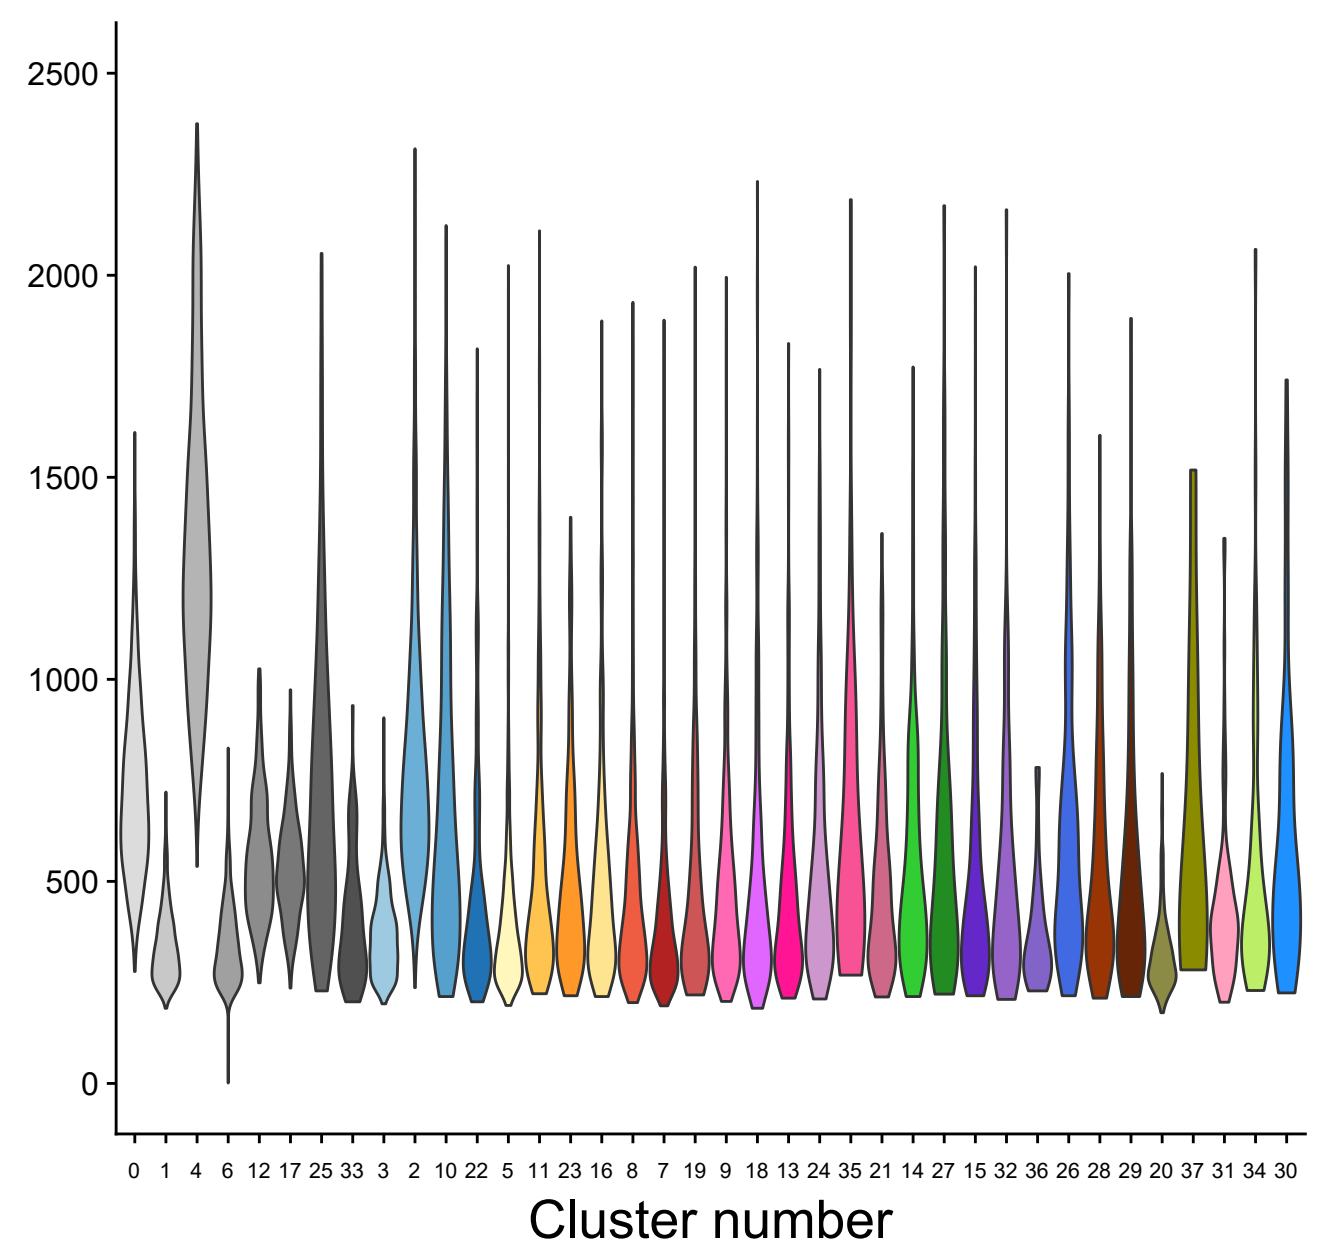



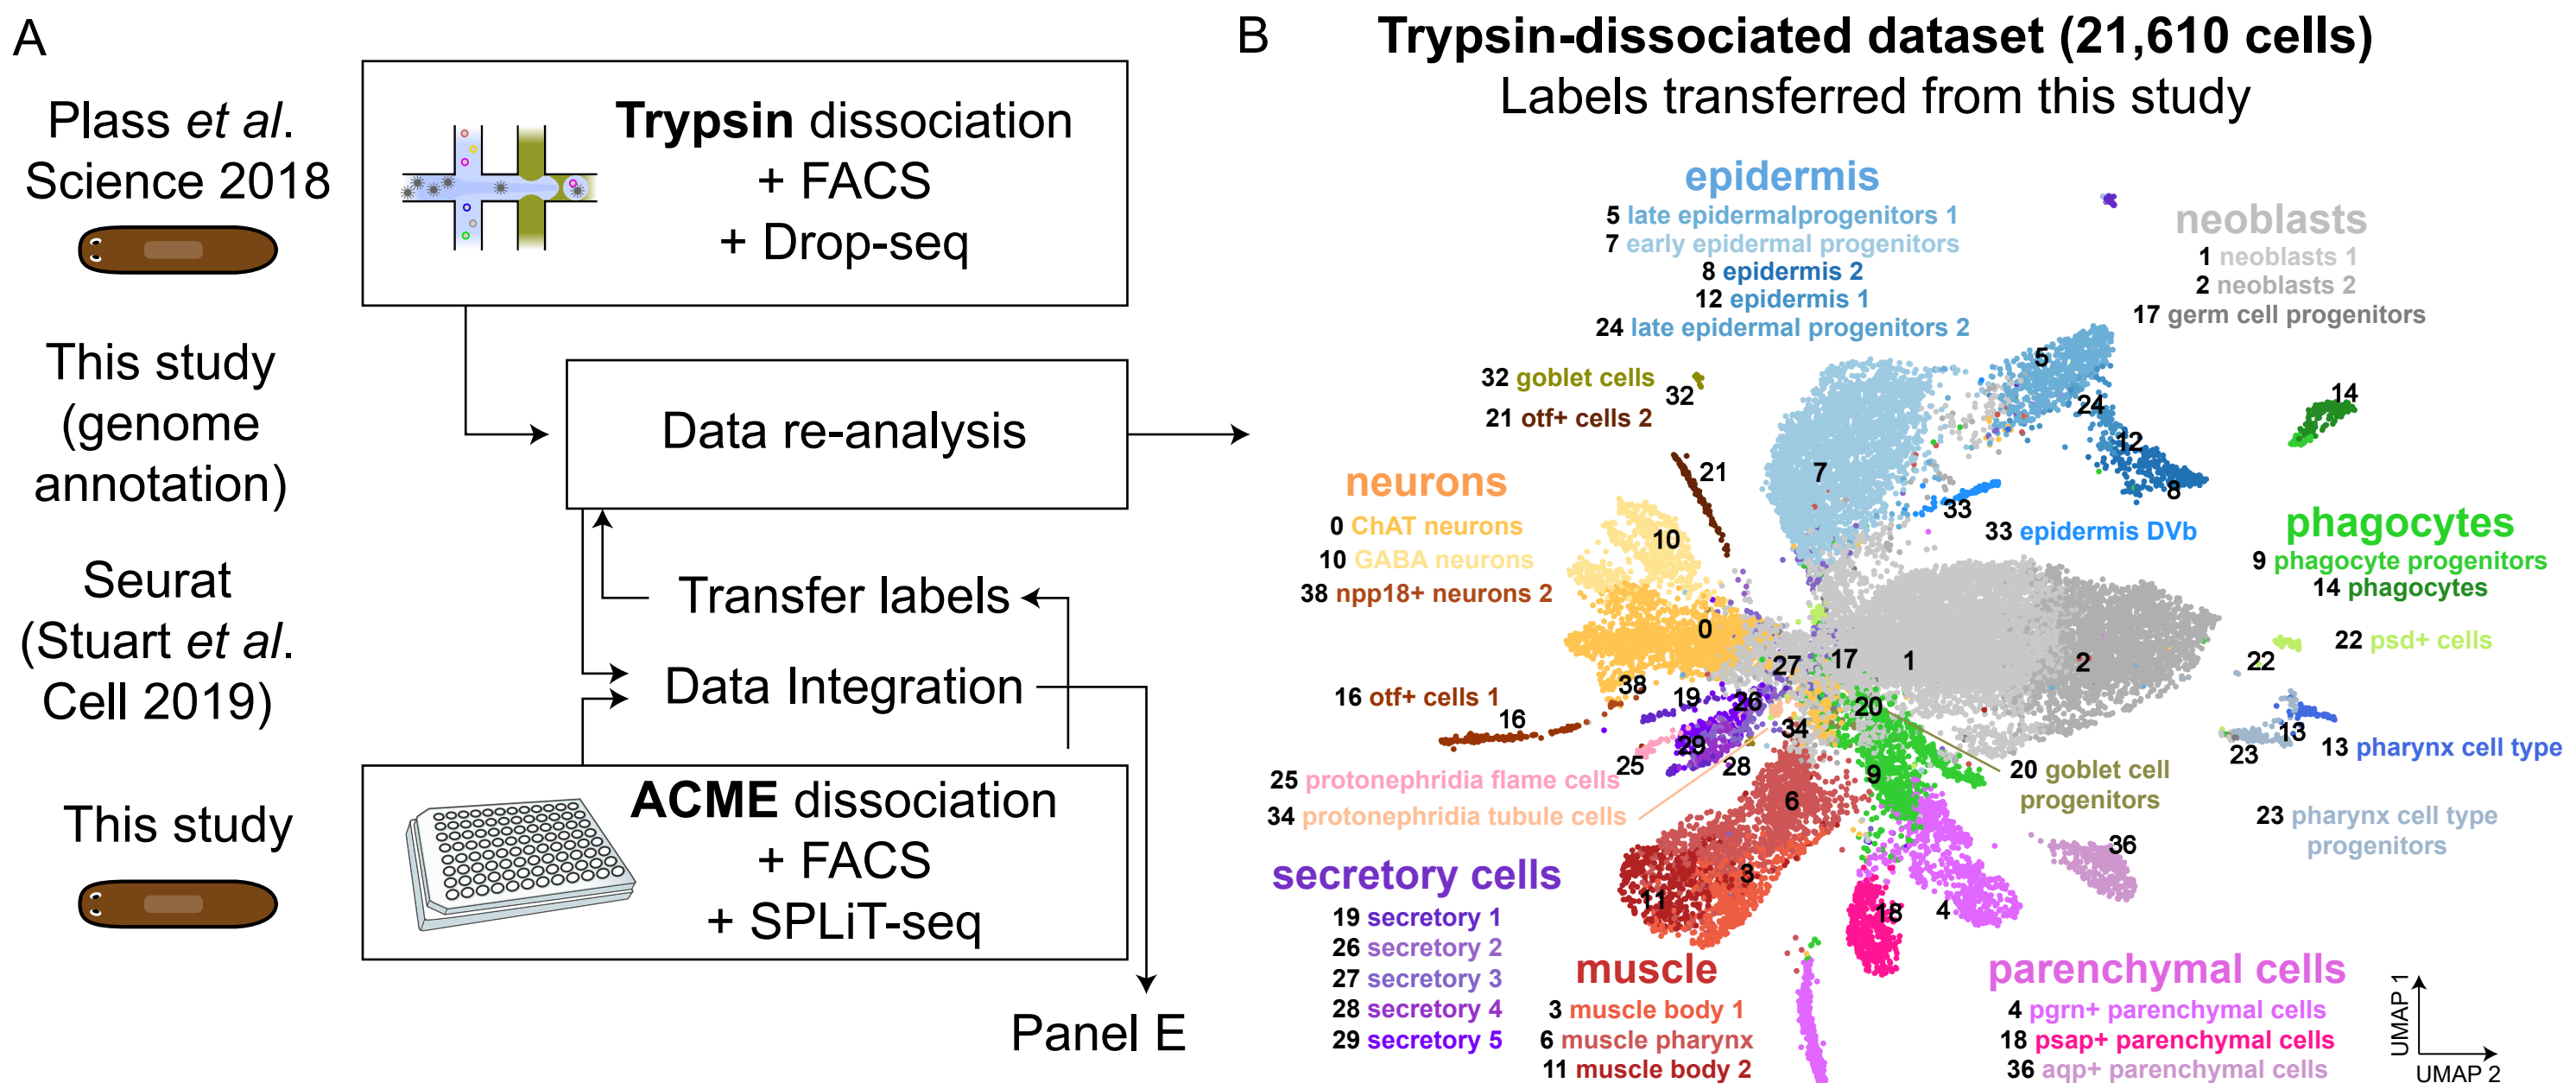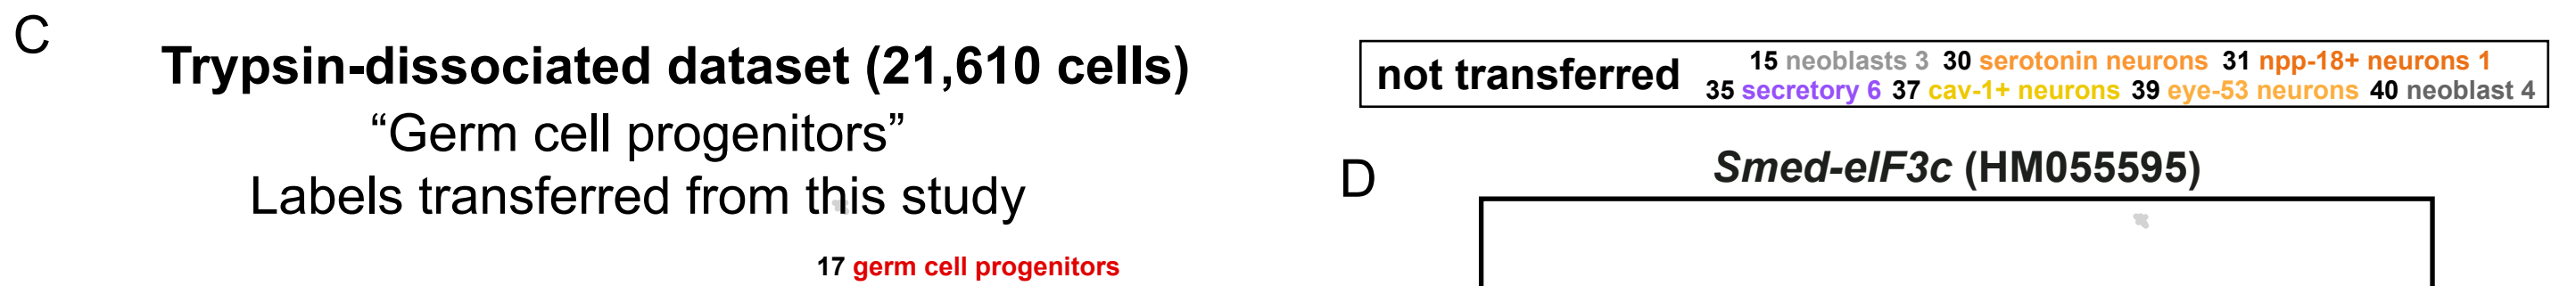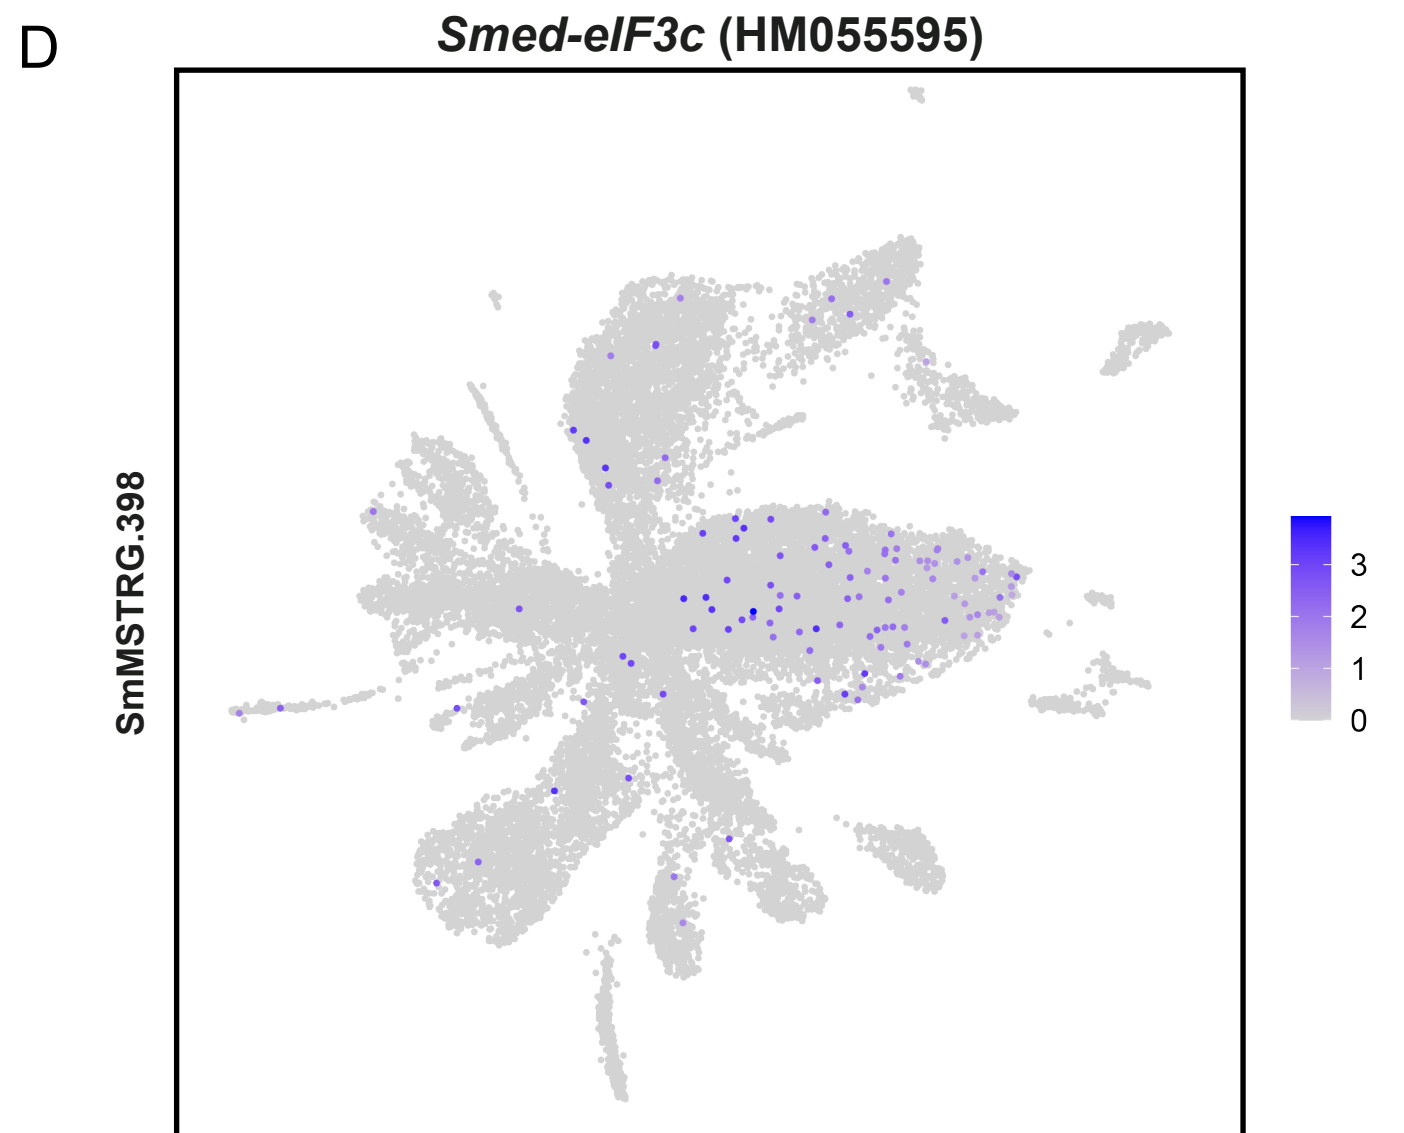

**E** Data Integration Labels transferred from Plass *et al.*

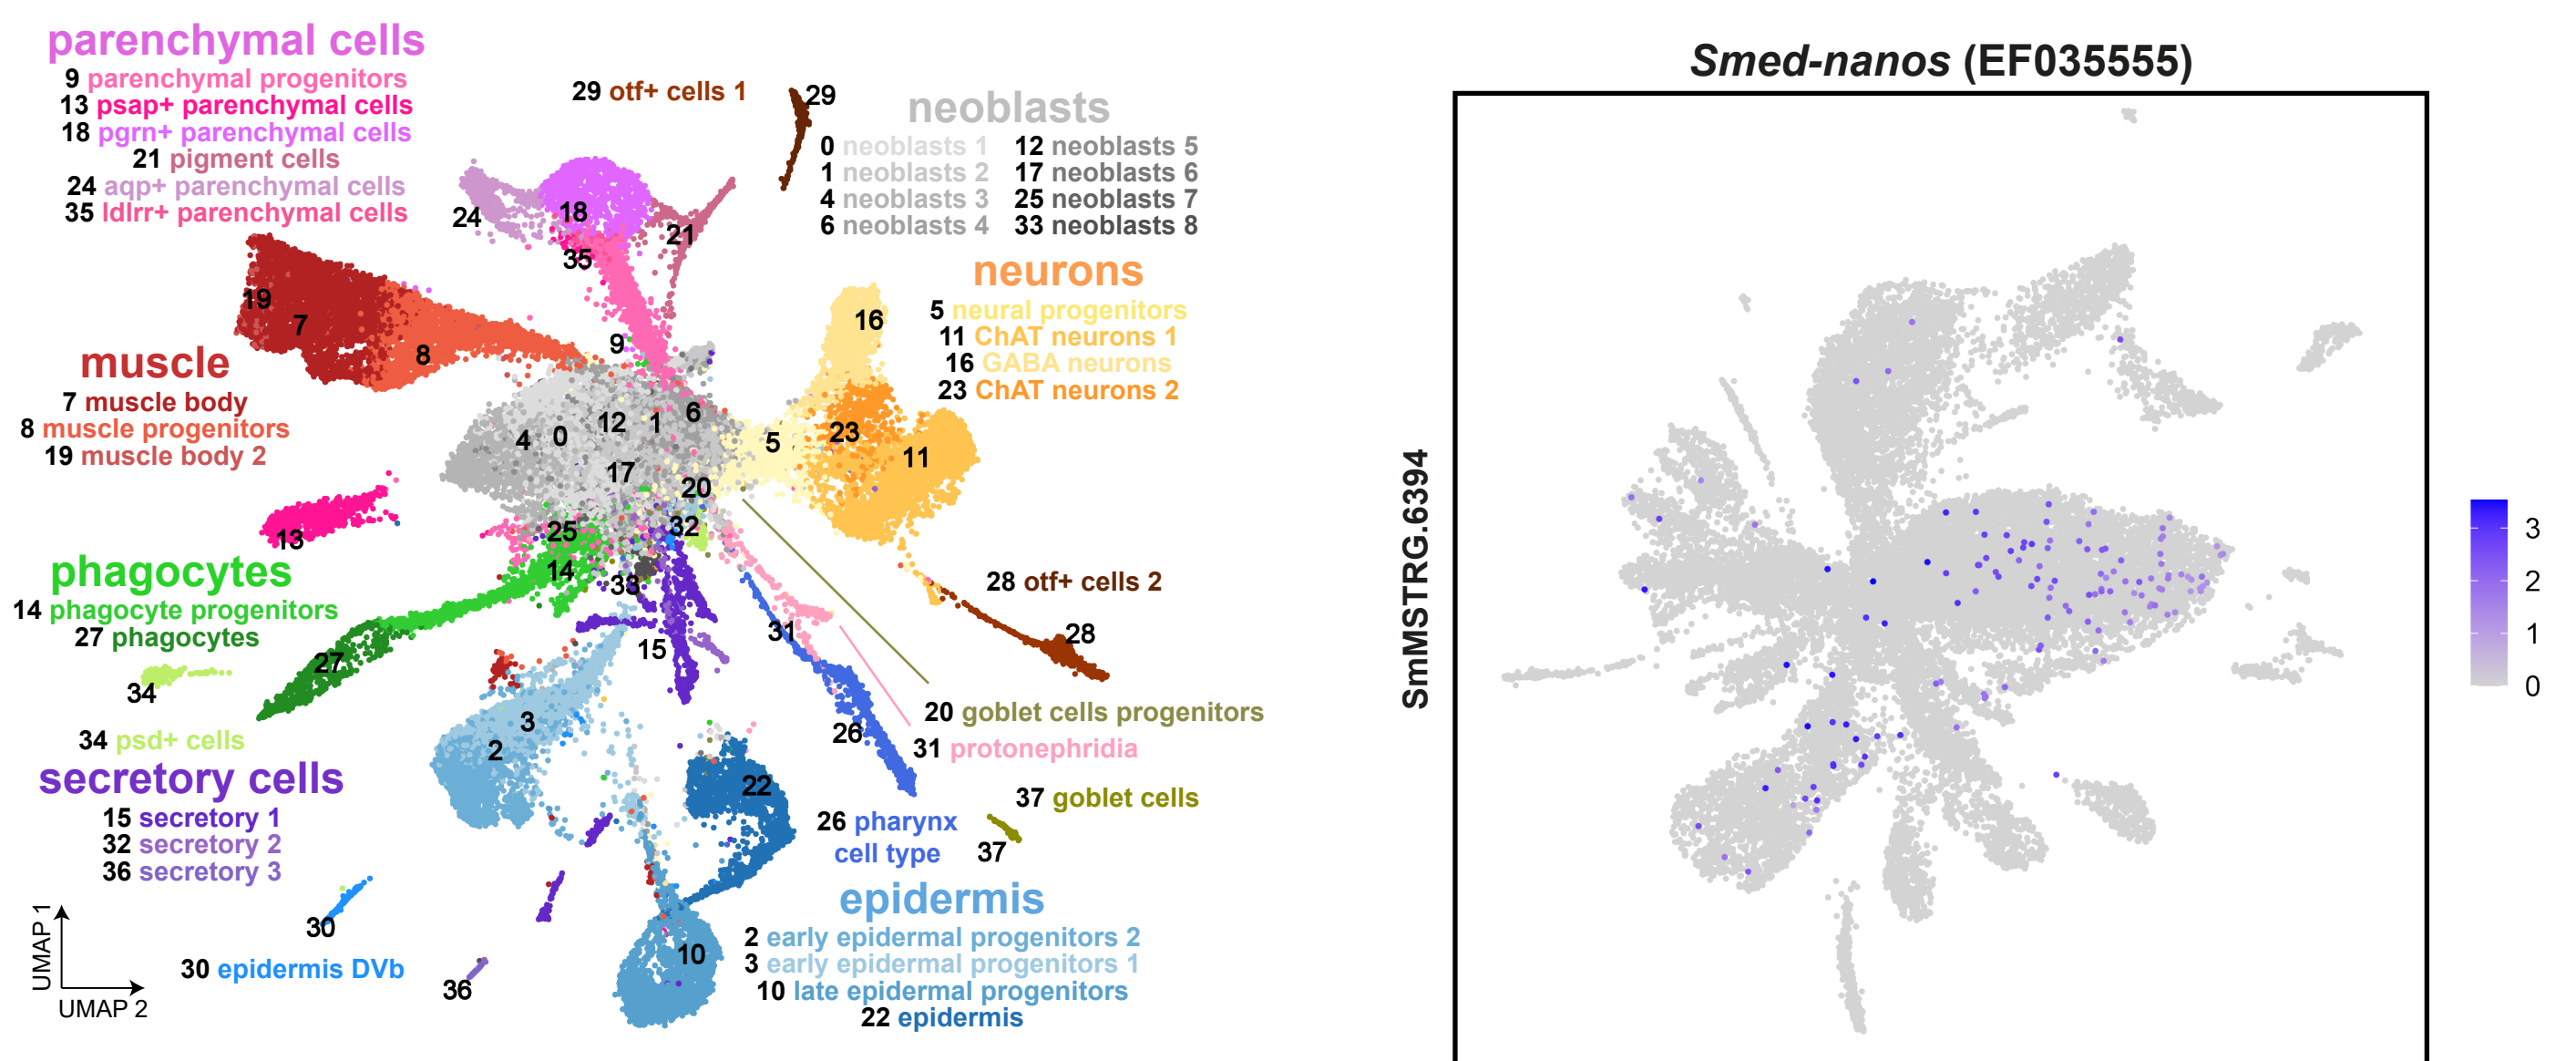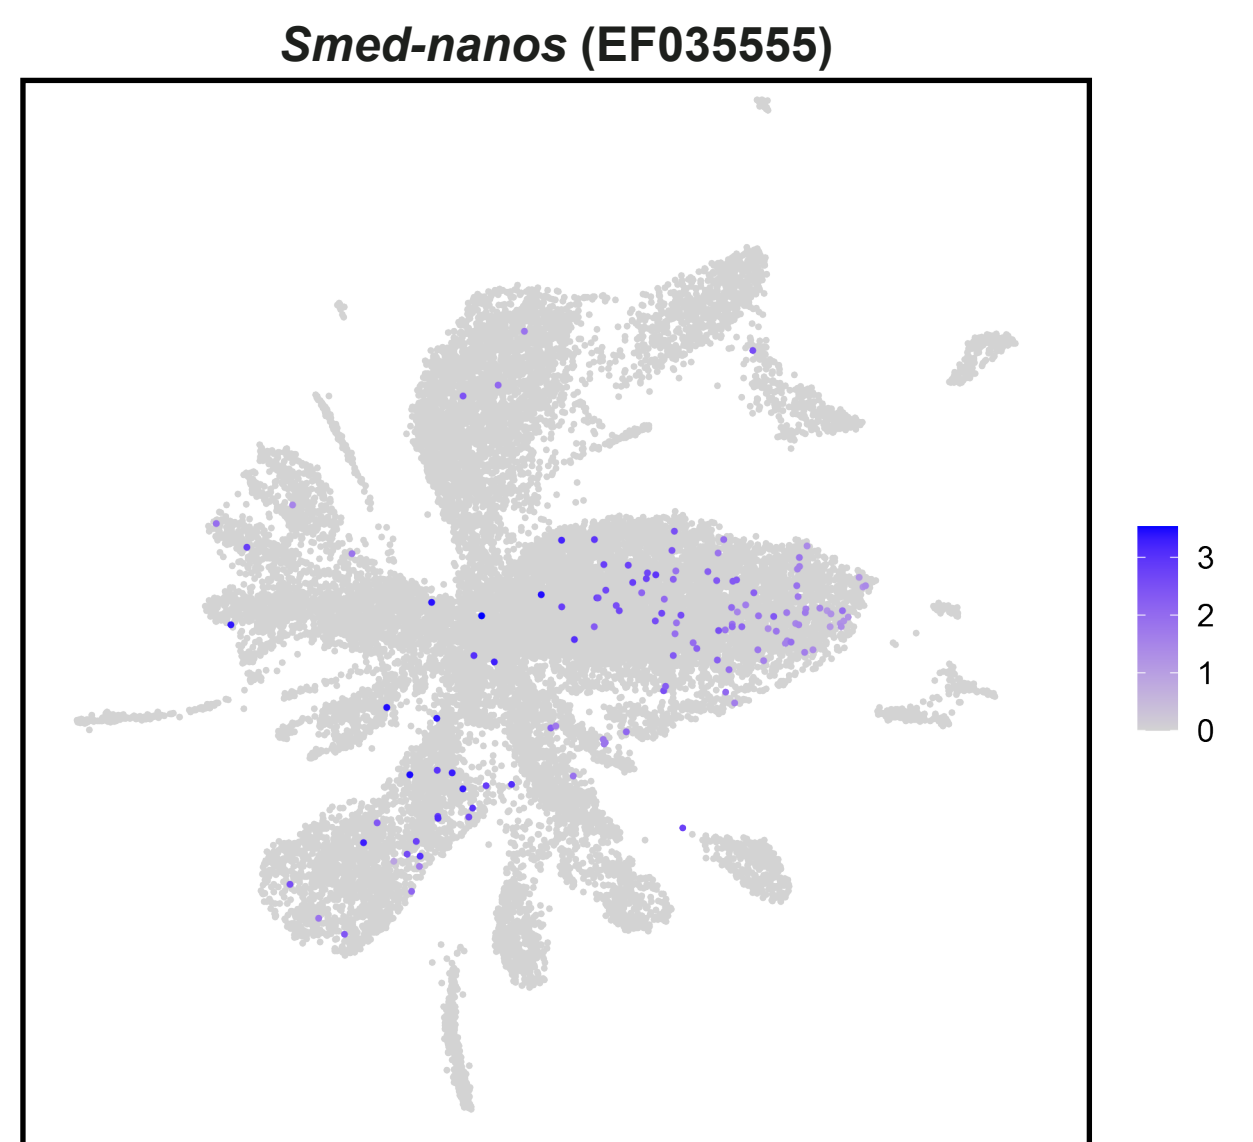

Supplement: 13059_2021_2302_MOESM1_ESM.pdf [file 13059_2021_2302_MOESM1_ESM.pdf]
